# Supplementary material for: Comparative assessment of CDS, CLSI disc diffusion and Etest techniques for antimicrobial susceptibility testing of Neisseria gonorrhoeae: a 6-year study
Source: PubMed Central journal article supplement — BMJ Open. 2012 Jul 2;2(4):e000969. doi: 10.1136/bmjopen-2012-000969 (PMC3391364; doi:10.1136/bmjopen-2012-000969), 2012-07-02
Supplement: bmjopen-2012-000969-s1.pdf [file bmjopen-2012-000969-s1.pdf]

## **Research Check List**

- Article type
- Title
- Author names
- Author affiliations, and corresponding author's full details
- Article summary
- Abstract
- Keywords
- Study approval
- Patient consent
- Funding statement
- Competing interests
- Contributor statement
