# Supplementary material for: Comparative assessment of CDS, CLSI disc diffusion and Etest techniques for antimicrobial susceptibility testing of Neisseria gonorrhoeae: a 6-year study
Source: PubMed Central journal article supplement — BMJ Open. 2012 Jul 2;2(4):e000969. doi: 10.1136/bmjopen-2012-000969 (PMC3391364; doi:10.1136/bmjopen-2012-000969), 2012-07-02
Supplement: bmjopen-2012-000969.draft_revisions.pdf [file bmjopen-2012-000969.draft_revisions.pdf]

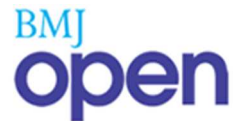

**Comparative assessment of CDS, CLSI and Etest techniques  
for antimicrobial susceptibility testing of Neisseria  
gonorrhoeae: A six year study**

|                                 |                                                                                                                                                                                                                                                                                     |
|---------------------------------|-------------------------------------------------------------------------------------------------------------------------------------------------------------------------------------------------------------------------------------------------------------------------------------|
| Journal:                        | <i>BMJ Open</i>                                                                                                                                                                                                                                                                     |
| Manuscript ID:                  | bmjopen-2012-000969                                                                                                                                                                                                                                                                 |
| Article Type:                   | Research                                                                                                                                                                                                                                                                            |
| Date Submitted by the Author:   | 31-Jan-2012                                                                                                                                                                                                                                                                         |
| Complete List of Authors:       | Singh, Vikram; VMMC and Safdarjung Hospital, Apex Regional STD Centre Bala, Manju; VMMC and Safdarjung Hospital, Apex Regional STD Centre Kakran, Monika; VMMC and Safdarjung Hospital, Apex Regional STD Centre Ramesh, V.; VMMC and Safdarjung Hospital, Apex Regional STD Centre |
| <b>Primary Subject Heading</b>: | Sexual health                                                                                                                                                                                                                                                                       |
| Secondary Subject Heading:      | Diagnostics, Infectious diseases                                                                                                                                                                                                                                                    |
| Keywords:                       | Microbiology < BASIC SCIENCES, Diagnostic microbiology < INFECTIOUS DISEASES, PUBLIC HEALTH                                                                                                                                                                                         |
|                                 |                                                                                                                                                                                                                                                                                     |

SCHOLARONE™  
Manuscripts

1  
2  
3  
4 **Comparative assessment of CDS, CLSI and Etest techniques for**  
5  
6 **antimicrobial susceptibility testing of *Neisseria gonorrhoeae*: A six year**  
7  
8 **study**  
9  
10

11  
12  
13  
14  
15 **Vikram Singh, Manju Bala, Monika Kakran and V. Ramesh**  
16  
17

18  
19  
20 **Apex Regional STD Teaching, Training & Research Centre, Vardhman Mahavir**  
21  
22 **Medical College & Safdarjung Hospital, New Delhi, India.**  
23  
24

25  
26  
27 **Correspondence to:**  
28

29  
30 Dr. Manju Bala, Consultant (Microbiology) and Associate Professor, Apex Regional STD  
31  
32 Teaching, Training & Research Centre, 5<sup>th</sup> Floor, New OPD Building, Vardhman Mahavir  
33  
34 Medical College & Safdarjung Hospital, New Delhi, India. Telephone number: 91-11-  
35  
36 26196740, Fax number: 91-11-26163072, Email: [manjubala\\_2@hotmail.com](mailto:manjubala_2@hotmail.com)  
37  
38  
39

40  
41  
42 **Word count:** 2913 words  
43

44 **Keywords:** *Neisseria gonorrhoeae*, CDS disc diffusion, CLSI, Etest, Gonococcal  
45  
46 Antimicrobial Surveillance Programme.  
47

48  
49 **Running title:** Comparison of CDS, CLSI, Etest for susceptibility testing of *N. gonorrhoeae*  
50  
51  
52  
53  
54  
55  
56  
57  
58  
59  
60

## ARTICLE SUMMARY

### Article focus

- A variety of techniques are available for antimicrobial susceptibility testing (AST) of *Neisseria gonorrhoeae*.
- The aim of this study to find a cost-effective, reliable and easily applicable microbiological method to detect antimicrobial susceptibilities of *N. gonorrhoeae* in resource poor countries.

### Key messages

- This study highlighted that the CDS technique yielded excellent category agreement with their analogous Etest MICs in comparison to CLSI technique.
- CDS offers the advantage for those laboratories that process small numbers of specimens.
- CDS technique is cost-effective, reliable and easily applicable microbiological method to detect antimicrobial susceptibilities of *Neisseria gonorrhoeae* in resource poor countries.
- This technique will facilitate enhanced antimicrobial resistance surveillance and direct and meaningful comparison of resistance data generated within different national and international laboratories.

### Strengths and limitations of this study

- This is the first study to determine the comparability of CDS and CLSI disc diffusion method with Etest MICs and to accurately and reproducibly assess *N. gonorrhoeae* susceptibilities for penicillin, tetracycline, ceftriaxone, ciprofloxacin and spectinomycin, commonly used for susceptibility testing.
- Susceptibility testing for cefixime, cefpodoxime, gentamicin and azithromycin was performed only by one method because of non-availability of interpretation criteria for these antimicrobials or limitation of resources. Therefore, comparison of above three techniques could not be carried out for these antibiotics.

## ABSTRACT

**Background:** A variety of techniques are available for antimicrobial susceptibility testing (AST) of *Neisseria gonorrhoeae*.

**Objective:** The aim of this study was to find a cost-effective, reliable and easily applicable microbiological method to detect antimicrobial susceptibilities of *N. gonorrhoeae* in resource poor countries.

**Design:** Prospective study.

**Setting:** Male STD clinic and female STD clinic of Regional STD Teaching, Training and Research Centre, New Delhi, India.

**Participants:** *N. gonorrhoeae* isolates from all male and female patients presenting with acute gonococcal urethritis and cervical discharge.

**Material and Methods:** A total of consecutive 295 *N. gonorrhoeae* isolates during 2005 to 2010, were used to compare the CLSI and CDS disc diffusion technique with Etest by performing antimicrobial susceptibility testing in parallel for penicillin, tetracycline, ceftriaxone, ciprofloxacin and spectinomycin. WHO reference strains were used as controls.

**Results:** CDS disc diffusion zones of inhibition showed that complete percentage agreement for penicillin, ciprofloxacin and tetracycline was high with their analogous Etest MICs in comparison to CLSI technique i.e. 91.5%, 92.9%, 99.3% versus 87.5%, 88.5% and 74.9% respectively. CDS results had less number of major and minor category discrepancies in comparison to CLSI technique and CDS method showed excellent correlation coefficient ( $r = 1$ ) with Etest for all five antimicrobial agents tested in comparison to CLSI ( $r = 0.92$ ). It was very poor ( $r = 0.61$ ) by CLSI method for tetracycline.

1  
2  
3 **Conclusions** The CDS technique is an attractive alternative for *N. gonorrhoeae* susceptibility  
4 testing and is recommended for monitoring the antimicrobial susceptibility in less developed  
5 and resource poor settings to facilitate enhanced antimicrobial resistance (AMR) surveillance  
6 when the WHO Gonococcal Antimicrobial Surveillance Programme is undergoing expansion  
7 to meet the ongoing challenges of surveillance and control of gonococcal AMR.  
8  
9  
10  
11  
12  
13  
14  
15  
16  
17  
18  
19  
20  
21  
22  
23  
24  
25  
26  
27  
28  
29  
30  
31  
32  
33  
34  
35  
36  
37  
38  
39  
40  
41  
42  
43  
44  
45  
46  
47  
48  
49  
50  
51  
52  
53  
54  
55  
56  
57  
58  
59  
60

## INTRODUCTION

Gonorrhoea caused by *Neisseria gonorrhoeae* (*N. gonorrhoeae*) is one of the most common sexually transmitted infections and is a global health problem. Uncomplicated urogenital *N. gonorrhoeae* infections can lead to epididymitis in males and salpingitis in females, conditions that are associated with infertility. In some cases localized infections can lead to haematogenic dissemination causing severe complications like sepsis, meningitis and endocarditis. The worldwide distribution of *N. gonorrhoeae* and the emergence of resistance to various antimicrobials emphasize the importance of antimicrobial resistance (AMR) surveillance of clinical gonococcal isolates.

Antimicrobial susceptibility testing (AST) may be carried out by a variety of techniques. The most commonly used methods have been the high-content disc diffusion method first described by Bauer *et al*,[1] and later modified by the National Committee for Clinical Laboratory Standards (NCCLS),[2] the broth microdilution technique as described by the NCCLS,[3] the agar dilution method described by Ericsson and Sherris,[4] and adapted by the NCCLS,[3] more recently Etest (AB Biodisk, Solna, Sweden), a modification of the disc diffusion and the agar dilution methods mentioned previously. The Etest is an impervious carrier with a continuous gradient of antimicrobial agent applied to one side of the strip. The test is performed in the same manner as the disc diffusion test, but determines a minimal inhibitory concentration (MIC) of antimicrobial agent rather than a category result based on a zone size. The Calibrated Dichotomous Sensitivity (CDS) test is a method for determining the antibiotic susceptibility of micro-organisms using agar disc diffusion and was developed in 1969 by Sydney M. Bell assisted by members of the Department of Microbiology, The Prince of Wales Hospital, Sydney, Australia. It was introduced into laboratory practice in

1  
2  
3 Australia in an effort to correct the unsatisfactory results of antibiotic susceptibility testing in  
4  
5  
6 Australia that were obtained from surveys conducted by The Royal College of Pathologists  
7  
8 of Australia in the late 60's and early 70's.[5]  
9

10  
11 The recent emergence of *N. gonorrhoeae* isolates with decreased susceptibility and resistance  
12  
13 to the currently recommended treatment guidelines of the Centers for Disease Control and  
14  
15 Prevention, including extended-spectrum cephalosporins (ESC), has further established the  
16  
17 necessity for a standardized, reliable, economical, less labor intensive and reproducible  
18  
19 susceptibility testing method.[6-8] Previous studies with the Etest determined that results  
20  
21 correlated well with the reference agar dilution method and that it is a useful guide for  
22  
23 determining chemotherapy against many organisms,[9] including gonococci.[9-11] The CDS  
24  
25 disc diffusion technique is recommended by WHO Collaborating Centre for STD, Sydney,  
26  
27 Australia and was regarded as the only practical and affordable means of phenotypic  
28  
29 susceptibility testing.[12] It was found to be cost-effective and more feasible during an  
30  
31 external quality assurance scheme in routine diagnostic laboratories in developing countries  
32  
33 like India.[12] Earlier this method was evaluated in comparison to Etest for only three  
34  
35 antibiotics (ciprofloxacin, penicillin, and ceftriaxone) and that also on a limited number of  
36  
37 isolates.[13] Recently, CDS technique has been recommended in less resourced settings for  
38  
39 detection of decreased susceptibility to ESCs using cefpodoxime disc.[14] The purpose of  
40  
41 this study was to determine the comparability of the Etest, CDS and Clinical and Laboratory  
42  
43 Standards Institute (CLSI), formerly NCCLS, to accurately and reproducibly assess *N.*  
44  
45  
46  
47  
48  
49  
50  
51  
52  
53  
54  
55  
56  
57  
58  
59  
60  
*gonorrhoeae* susceptibilities for five antibiotics commonly used for susceptibility testing,  
which included penicillin, tetracycline, ceftriaxone, spectinomycin and ciprofloxacin and to  
assess the feasibility of recommending CDS technique for its use in developing and resource



1  
2  
3 poor countries. To our knowledge, this is the first study to compare the two disc diffusion  
4 methods with MIC testing for above five antibiotics.  
5  
6  
7  
8  
9

## 10 11 **MATERIALS AND METHODS**

### 12 13 14 ***N. gonorrhoeae* isolates**

15  
16 A total of 295 *N. gonorrhoeae* isolates from all male and female patients presenting with  
17 acute gonococcal urethritis and cervical discharge respectively to the Regional STD  
18 Teaching, Training and Research Centre, Safdarjung Hospital, New Delhi, India from  
19 January 2005 to December 2010 were included in the study. The strains were consecutive  
20 and nonrepetitive. Methods used for isolation and identification of *N. gonorrhoeae* have been  
21 described previously.[15]  
22  
23  
24  
25  
26  
27  
28  
29

### 30 31 **$\beta$ -lactamase testing**

32  
33 *N. gonorrhoeae* isolates were tested for  $\beta$ -lactamase production by the chromogenic  
34 cephalosporin method using nitrocefin freeze dried powder (Oxoid) or nitrocefin slide  
35 (Becton, Dickinson and Company, Maryland).[15]  
36  
37  
38  
39

### 40 41 **Antimicrobial susceptibility testing**

#### 42 43 *CDS disc diffusion technique*

44  
45 Antibiotic susceptibility testing of all the 295 *N. gonorrhoeae* isolates was performed by the  
46 CDS technique on chocolate agar plates with low concentration antibiotic discs (Oxoid  
47 Basingstoke, UK). Six antibiotics with concentrations recommended i.e. penicillin (0.5 IU),  
48 tetracycline (10 $\mu$ g), ceftriaxone (0.5 $\mu$ g), ciprofloxacin (1 $\mu$ g), spectinomycin (100 $\mu$ g) and  
49 nalidixic acid (30 $\mu$ g) were used as per standard methodology.[16] The strains were  
50  
51  
52  
53  
54  
55  
56  
57  
58  
59  
60

1  
2  
3 interpreted as susceptible, less susceptible and resistant. Nalidixic acid was used only to  
4  
5 identify isolates less susceptible to ciprofloxacin and results of susceptibility to this antibiotic  
6  
7 are not included.  
8  
9

#### 10 11 *CLSI disc diffusion method*

12  
13 Same inoculum was used for this method, which was performed using GC agar base with 1%  
14  
15 isovitalex or vitamino growth supplement (Hi Media, India) with higher disc concentration  
16  
17 recommended by CLSI i.e. penicillin (10 IU), tetracycline (30µg), ceftriaxone (30µg),  
18  
19 ciprofloxacin (5µg), spectinomycin (100µg) and nalidixic acid (30µg) were used.[17] The  
20  
21 strains were defined as susceptible, less susceptible and resistant.  
22  
23  
24

#### 25 26 *Minimum Inhibitory Concentration (MIC) determination*

27  
28 The MICs of all the isolates for penicillin, tetracycline, ciprofloxacin, spectinomycin, and  
29  
30 ceftriaxone were determined by the Etest method (AB Biodisk, Solna, Sweden) on GC agar  
31  
32 base with 1% isovitalex or vitamino growth supplement. The Etest was performed as  
33  
34 specified in the manufacturer's product package insert. The Etest method was selected as the  
35  
36 reference method for comparison of results of CDS and CLSI techniques.  
37  
38  
39

#### 40 41 **Control strains**

42  
43 WHO reference strains C, G, K, L, O and Q were used as controls for disc diffusion and MIC  
44  
45 testing. The WHO control strains K and L with decreased susceptibility to extended-  
46  
47 spectrum cephalosporins were included in 2010 as these became available to this centre only  
48  
49 by the end of 2009. This centre participated in External Quality assurance Scheme (EQAS)  
50  
51 of gonococcal AST from 2001 to 2010 conducted by the Neisseria Reference Laboratory,  
52  
53 WHO Collaborating Centre for STD, Sydney, Australia. EQAS results every year showed  
54  
55  
56  
57  
58  
59  
60

1  
2  
3 almost 100% agreement with the reference laboratory expected results, except some  
4  
5 disagreement of results was observed for one strain for ceftriaxone in 2002, 2007, 2008, 2010  
6  
7  
8 and for one strain for penicillin in 2004 and 2010. On repeat testing, 100% agreement was  
9  
10 observed.

### 11 12 13 **Statistical analysis**

14  
15  
16 Discrepancies were differentiated into three categories, minor (involving the less susceptible  
17  
18 category), major (false susceptibility) and very major (false resistant) which are defined by  
19  
20 U.S. Department of Health and Human Services Food and Drug Administration.[18] Pearson  
21  
22 correlation coefficient (*r* values) was generated for each antimicrobial agent indexed by  
23  
24 susceptibility test method. Statistical correlation result was considered perfect for the  
25  
26 correlation coefficient (*r* value) of 1.00, desirable for  $\geq 0.90$  and acceptable for  $\geq 0.80$ .  
27  
28  
29  
30  
31  
32

### 33 **RESULTS**

34  
35  
36 The incidence of susceptible, less susceptible and resistant isolates differed following the  
37  
38 performance of both the disc diffusion assays and Etest (Table 1). Table 2 and 3 show the  
39  
40 comparison of discrepancies and agreement of CDS and CLSI method with Etest for five  
41  
42 different antibiotics. In overall, the rates of discrepancies for different antibiotics differed in  
43  
44 both the CDS and CLSI technique on comparison to Etest method. On comparison of CDS  
45  
46 method with Etest the highest discrepancy rate was observed for penicillin (8.5%) and lowest  
47  
48 for spectinomycin (0) and overall complete agreement was 82.0%. While, for CLSI method  
49  
50 highest discrepancy rate was detected for tetracycline (25.1%) and lowest for spectinomycin  
51  
52 (0) and overall complete agreement was 49.5%. A total no. of minor and major error was 133  
53  
54 and 16 respectively for CLSI while for CDS they were only 51 and 2 respectively. Complete  
55  
56  
57  
58  
59  
60

percentage agreement for penicillin, ciprofloxacin and tetracycline by CDS test was high in comparison to CLSI technique. It was found to be same for spectinomycin and ceftriaxone. Pearson's correlation coefficient was perfect for all the antibiotics by the CDS method in comparison to CLSI technique i.e.  $r$  value 1.00 versus 0.92. Moreover, it was very poor (0.61) by CLSI method for tetracycline. Results with individual antibiotics by the three techniques were as follows:

### **Penicillin**

Out of 295 isolates, 34 (11.5%), 156 (52.9%), and 105 (35.6%) isolates were interpreted as susceptible, less susceptible and resistant respectively by the Etest method (Table 1). On comparison of CDS and CLSI with Etest method, minor discrepancies were observed to be 8.5% and 12.5% respectively while no major or very major discrepancies were found. The complete percent agreement of penicillin for the CDS and CLSI method with Etest was 91.5% & 87.5% respectively and the essential agreement for both was found as 100% (Table 2 and 3). Penicillin demonstrated high level of correlation coefficient (0.99) on comparison of both the methods. Antibiotic susceptibility by the Etest method revealed that 105 (35.6%) isolates were resistant to penicillin, out of which 95 (32.2%) were  $\beta$ -lactamase positive and 10 (3.4%) were having chromosomally mediated resistance. Out of remaining 190 (64.4%) isolates, 156 (52.9%) had reduced susceptibility to penicillin and 34 (11.5%) were susceptible to penicillin.

### **Ciprofloxacin**

Only 1 (0.3%) isolate was found susceptible for ciprofloxacin with the Etest method. The no. of less susceptible and resistant isolates were 48 (16.3%) and 246 (83.4%) respectively (Table 1). Out of 246 resistant isolates, 102 (34.6%) were observed to have high level

1  
2  
3 resistance (MIC  $\geq$  4). On comparison of Etest method with CDS and CLSI methods, minor  
4  
5 discrepancies were observed as 7.1% and 11.5% respectively. The complete agreement for  
6  
7 both the CDS and CLSI was 92.9% and 88.5% respectively. No major and very major  
8  
9 discrepancies occurred. Person's correlation coefficient was excellent ( $r = 0.99$ ) for both the  
10  
11 methods (Table 2 and 3).  
12

### 13 **Ceftriaxone**

14  
15 Out of 295 isolates, 283 (95.9%) were susceptible and remaining 12 (4.1%) were observed to  
16  
17 have decreased susceptibility for ceftriaxone by the Etest method (Table 1). On comparison  
18  
19 of CDS and CLSI methods with the Etest method, 1.7% and 1.4% minor discrepancy were  
20  
21 observed respectively. The complete percent agreement for ceftriaxone was 98.3% and  
22  
23 98.6% for both the methods. Essential agreement for both the methods was 100% with the  
24  
25 Etest method (Table 2 and 3). Person's correlation coefficient was perfect ( $r = 1$ ) for both the  
26  
27 methods.  
28  
29  
30  
31  
32

### 33 **Spectinomycin**

34  
35 All the isolates were susceptible to spectinomycin, by all the three methods. This resulted in  
36  
37 100% of essential and complete agreement on comparison of the CDS and CLSI method with  
38  
39 the Etest method (Table 1-3).  
40  
41  
42

### 43 **Tetracycline**

44  
45 Out of 295 isolates, 58 (19.7%) were Tetracycline-resistant *N. gonorrhoeae* (TRNG) while  
46  
47 237 (80.3%) were Not-Tetracycline-resistant *N. gonorrhoeae* (N-TRNG) by the Etest method  
48  
49 (Table 1). Out of 237 N-TRNG isolates, 116 (39.3%), 91 (30.8%) and 30 (10.2 %) were  
50  
51 observed as susceptible, less susceptible and resistant respectively. On comparison of N-  
52  
53 TRNG isolates by the CLSI technique with the Etest method, 5.4% and 19.7% major and  
54  
55  
56  
57  
58  
59  
60

1  
2  
3 minor discrepancies were found respectively. The complete and essential percentage  
4  
5 agreement for the CLSI technique was 74.9% and 94.6% respectively. By the CDS method  
6  
7 60 (20.3%) isolates were observed to be TRNG and 235 (79.7%) N-TRNG. Only 2 (0.7%)  
8  
9 isolates were found under major discrepancy on comparison of the CDS method with Etest  
10  
11 method. Both complete and essential percent agreement between CDS and Etest method was  
12  
13 99.3%. Tetracycline demonstrated perfect correlation coefficient ( $r = 1$ ) for CDS and Etest  
14  
15 method on the basis of TRNG and N-TRNG category comparison. However, for comparison  
16  
17 of 80.3% N-TRNG isolates with Etest method, it was observed to be very poor ( $r = 0.61$ ) by  
18  
19 the CLSI technique (Table 2 and 3).  
20  
21  
22  
23  
24  
25  
26  
27  
28  
29  
30  
31  
32  
33  
34  
35  
36  
37  
38  
39  
40  
41  
42  
43  
44  
45  
46  
47  
48  
49  
50  
51  
52  
53  
54  
55  
56  
57  
58  
59  
60

Table 1. Results of susceptibility testing of 295 *N. gonorrhoeae* isolates for five antibiotics by three techniques from 2005-2010.

| Method | Penicillin |        |        | Ciprofloxacin |        |        | Spectinomycin |    |   | Ceftriaxone |       |   | Tetracycline |        |        | Tetracycline |        |
|--------|------------|--------|--------|---------------|--------|--------|---------------|----|---|-------------|-------|---|--------------|--------|--------|--------------|--------|
|        | S          | LS     | R      | S             | LS     | R      | S             | LS | R | S           | LS    | R | S            | LS     | R      | TRNG         | N-TRNG |
| Etest  | 34         | 156    | 105    | 1             | 48     | 246    | 295           | -  | 0 | 283         | 12    | 0 | 116          | 91     | 30     | 58           | 237    |
|        | (11.5)     | (52.9) | (35.6) | (0.3)         | (16.3) | (83.4) | (100)         |    |   | (95.9)      | (4.1) |   | (39.3)       | (30.8) | (10.2) | (19.7)       | (80.3) |
| CDS    | 30         | 151    | 114    | 1             | 27     | 267    | 295           | -  | 0 | 282         | 13    | 0 | -            | -      | -      | 60           | 235    |
|        | (10.2)     | (51.2) | (38.6) | (0.3)         | (9.2)  | (90.5) | (100)         |    |   | (95.6)      | (4.4) |   |              |        |        | (20.3)       | (79.7) |
| CLSI   | 21         | 157    | 117    | 1             | 64     | 230    | 295           | 0  | 0 | 283         | 12    | 0 | 80           | 103    | 64     | 48           | 247    |
|        | (7.1)      | (53.2) | (39.7) | (0.3)         | (21.7) | (78.0) | (100)         |    |   | (95.9)      | (4.1) |   | (27.1)       | (35.9) | (21.7) | (16.3)       | (83.7) |

S, Susceptible; LS, Less susceptible; R, Resistant; TRNG, Tetracycline Resistant *N. gonorrhoeae*; N-TRNG, Not-TRNG.

1  
2  
3  
4  
5  
6  
7  
8  
9  
10  
11  
12  
13  
14  
15  
16  
17  
18  
19  
20  
21  
22  
23  
24  
25  
26  
27  
28  
29  
30  
31  
32  
33  
34  
35  
36  
37  
38  
39  
40  
41  
42  
43  
44  
45  
46  
47  
48  
49

Table 2. Comparison of discrepancies and agreement between the CDS and Etest method for 295 *N. gonorrhoeae* isolates.

| Antimicrobial Agent | No. of discrepancies |       |            | % agreement |           | Correlation coefficient (r) |
|---------------------|----------------------|-------|------------|-------------|-----------|-----------------------------|
|                     | Minor                | Major | Very major | Complete    | Essential |                             |
| Penicillin          | 25                   | 0     | 0          | 91.5        | 100       | 0.99                        |
| Ciprofloxacin       | 21                   | 0     | 0          | 92.9        | 100       | 0.99                        |
| Spectinomycin       | 0                    | 0     | 0          | 100         | 100       | 1.0                         |
| Ceftriaxone         | 5                    | 0     | 0          | 98.3        | 100       | 1.0                         |
| Tetracycline        | 0                    | 2     | 0          | 99.3        | 99.3      | 1.0                         |
| All                 | 51                   | 2     | 0          | 82.0        | 99.3      | 1.0                         |



Table 3. Comparison of discrepancies and agreement between the CLSI and Etest method for 295 *N. gonorrhoeae* isolates.

| Antimicrobial<br><br>Agent | No. of discrepancies |       |            | % agreement |           | Correlation<br><br>coefficient<br><br>( r ) |
|----------------------------|----------------------|-------|------------|-------------|-----------|---------------------------------------------|
|                            | Minor                | Major | Very major | Complete    | Essential |                                             |
|                            | Penicillin           | 37    | 0          | 0           | 87.5      |                                             |
| Ciprofloxacin              | 34                   | 0     | 0          | 88.5        | 100       | 0.99                                        |
| Spectinomycin              | 0                    | 0     | 0          | 100         | 100       | 1.0                                         |
| Ceftriaxone                | 4                    | 0     | 0          | 98.6        | 100       | 1.0                                         |
| Tetracycline               | 58                   | 16    | 0          | 74.9        | 94.6      | 0.61                                        |
| All                        | 133                  | 16    | 0          | 49.5        | 94.6      | 0.92                                        |

## DISCUSSION

An important and essential measure for monitoring the effectiveness of recommended drugs for the treatment of gonorrhoea is surveillance of the in vitro antimicrobial susceptibilities of clinical isolates of *N. gonorrhoeae*. The recommend procedure for antimicrobial susceptibility testing of gonococci is determination of the MICs by an agar dilution technique.[17] However, this method is laborious and cumbersome, is difficult to standardize, and is performed only in research laboratories, mainly in industrialized countries. Moreover, agar dilution technique requiring a number of isolates at one time is not a feasible technique for determining MIC for this organism because the numbers of isolates even in a central level laboratory are very few and *N. gonorrhoeae* being a fastidious organism is difficult to store for long periods. Etest in a number of studies has already been shown to be an effective alternative and a more appropriate method than the agar dilution technique for MIC determination for *N. gonorrhoeae* by laboratories in developing countries, where resistance of gonococci to antimicrobial agents is a major public health problem.[9-11, 19] Therefore, the Etest method was considered as the reference method in this study for comparison of MIC results with CDS and CLSI disc diffusion techniques, as excellent essential agreement (92-99% ) was demonstrated between Etest and standard agar dilution technique for the antibiotics commonly used for susceptibility testing of *N. gonorrhoeae*,[19] and these percentages were above the recommended limitations ( $\geq 90\%$ ) set by the Food and Drug Administration's *Review Criteria for Assessment of Antimicrobial Susceptibility Devices*, confirming that the Etest satisfactorily approximates the agar reference method.[19] Yeung KH *et al*,[11] also reported 98% overall agreement between Etest and the agar dilution method.

1  
2  
3 The original purpose of this study was to assess reliability and comparability of the CDS and  
4 CLSI method to predict the interpretative categories of susceptibility as compared with  
5 standard Etest method. However, because all test procedures were done from a single  
6 inoculum and were carefully controlled, we had a unique opportunity to compare the two  
7 methods with Etest method which was used as gold standard. Protocols in both the disc  
8 diffusion techniques differ in their choices of test medium, antibiotic disc content, and  
9 interpretative breakpoint criteria. Zones of inhibition delineating susceptible, less susceptible  
10 and resistant isolates from disc diffusion procedures must correlate with corresponding  
11 MICs. In the present study, CDS results correlation was excellent with Etest MICs which had  
12 less number of major and minor category discrepancies in comparison to CLSI technique i.e.  
13 2 and 52 versus 16 and 133. Complete percent agreement of CDS with Etest was 82.0%  
14 while for CLSI method it was 49.5% which was very poor agreement. CDS method showed  
15 excellent correlation coefficient ( $r = 1$ ) with Etest for all five antimicrobial agents tested in  
16 comparison to CLSI ( $r = 0.92$ ). Previously study of our centre had shown 96.9 percent  
17 agreement for ceftriaxone for comparison of CDS with Etest technique.[13] Interpretation of  
18 disc inhibition zones in CDS method was easier than in the CLSI technique especially when  
19 the zone size was near the breakpoint. Double zone of inhibition was observed many times in  
20 CLSI technique leading to difficulty in interpretation.

21  
22 In an another study from WHO Collaborating Centre for STD in Australia and Sweden, the  
23 correlation between results of CDS disc diffusion testing (cefpodoxime), and MIC  
24 determinations with agar dilution and Etest using cefpodoxime, cefixime and ceftriaxone for  
25 the detection of decreased ESC susceptibility in *N. gonorrhoeae* was investigated.[14] CDS  
26 technique using cefpodoxime 10 µg disc was shown to provide high sensitivity for detection  
27  
28  
29  
30  
31  
32  
33  
34  
35  
36  
37  
38  
39  
40  
41  
42  
43  
44  
45  
46  
47  
48  
49  
50  
51  
52  
53  
54  
55  
56  
57  
58  
59  
60

1  
2  
3 of gonococcal isolates with decreased ESC susceptibility and it was suggested that this disc  
4 test will make it possible to provide AMR surveillance data also from less-developed and/or  
5 less-resourced settings, where disc testing is the only practical and affordable means of AMR  
6 testing.[14]  
7  
8  
9

10  
11  
12 Our findings reveal poor correlation between CLSI disc diffusion results and Etest MICs,  
13 most notably for tetracycline, penicillin and ciprofloxacin. Excellent correlation was  
14 observed for ceftriaxone and spectinomycin, reason being that resistance was not reported for  
15 these antimicrobial agents in the present study. Emergence of resistance to both these  
16 antibiotics may lead to poor agreement between CLSI and Etest. Our results compared well  
17 with that from China,[20] where poor per cent agreement was reported between the CLSI and  
18 agar dilution technique for MIC testing. It was 73.6%, 72.3% and 71.4% for ciprofloxacin,  
19 penicillin and ceftriaxone respectively. Given the disparity among susceptibility test results  
20 presented here, errors associated with susceptibility testing may result in the unwarranted  
21 utilization or elimination of these antibiotics as part of possible treatment regimens.  
22  
23  
24  
25  
26  
27  
28  
29  
30  
31  
32  
33  
34  
35

36 The results of our study suggest that CDS technique could be reliably used in resistance  
37 surveillance programmes for public health purposes and it can be recommended for use by all  
38 the focal point laboratories in WHO GASP network in SEAR because of its excellent  
39 agreement with Etest results and also it was simple, cost-effective and results are easier to  
40 interpret. In many developing countries in SEAR and other regions, most afflicted by  
41 gonorrhoea and AMR, MIC determination using agar dilution method or Etest is not readily  
42 accessible or affordable. Especially in those countries, the availability of a sensitive, rapid,  
43 inexpensive, easily performed and effective disc test can be highly valuable. Use of a  
44  
45  
46  
47  
48  
49  
50  
51  
52  
53  
54  
55  
56  
57  
58  
59  
60

1  
2  
3 standardized agar diffusion method is practical in these situations and allows fast and  
4  
5 reproducible results for clinical microbiology laboratories if standards are observed.[21]  
6  
7  
8 To conclude, this is the first study to compare CDS and CLSI disk diffusion method with  
9  
10 Etest and the CDS technique yielded excellent category agreement results when compared  
11  
12 with the Etest. The data obtained in the present study suggest that the CDS technique is an  
13  
14 accurate alternative method for susceptibility testing of *N. gonorrhoeae* for various  
15  
16 antimicrobial agents. It is much less cumbersome than the current reference method because  
17  
18 of its simplicity, less consumption of media and glassware and is a more appropriate  
19  
20 technique in settings with minimal microbiological resources. CDS offers the advantage for  
21  
22 those laboratories that process small numbers of specimens and these laboratories could  
23  
24 determine the susceptibilities of gonococcal isolates reasonably accurately. This could  
25  
26 facilitate direct and meaningful comparison of resistance data generated within different  
27  
28 national and international laboratories.  
29  
30  
31  
32  
33  
34  
35  
36

37 **Acknowledgements:** The authors are indebted to Prof. John W. Tapsall, Ms. Athena  
38  
39 Limnios and Dr. Monica M Lahra, WHO collaborating centre for STD, Department of  
40  
41 Microbiology, The Prince of Wales Hospital, Sydney, Australia for supplying WHO  
42  
43 Reference strains and low concentration antibiotic discs. The support of WHO and NACO is  
44  
45 gratefully acknowledged. We are grateful to Mrs. Leelamma Peter and Mr. Naveen Chandra  
46  
47 Joshi for their excellent technical assistance.  
48  
49

50  
51 **Funding:** Nil.

52  
53  
54 **Competing interests:** None declared.

55  
56  
57 **Ethical approval:** Not required.  
58  
59  
60

1  
2  
3 **Contributors:** MB designed the study and coordinated the work. VS and MB carried out  
4 analysis of data and preparation of manuscript. MK participated in data analysis and VR  
5  
6 collaborated in the writing of the manuscript.  
7  
8  
9

10  
11  
12  
13 There is no additional data available.  
14  
15

### 16 17 18 **Copyright** 19

20 The Corresponding Author has the right to grant on behalf of all authors and  
21 does grant on behalf of all authors, an exclusive licence (or non exclusive for  
22 government employees) on a worldwide basis to the BMJ Publishing Group Ltd to  
23 permit this article (if accepted) to be published in STI and any other BMJPG  
24 products and sub-licences such use and exploit all subsidiary rights, as set out  
25 in our licence (<http://sti.bmjournals.com/ifora/licence.pdf>).  
26  
27  
28  
29  
30  
31  
32  
33

### 34 35 **REFERENCES** 36

- 37 1 Bauer AW, Kirby WM, Sherris JC, *et al.* Antibiotic susceptibility testing by a  
38 standardized single disk method. *Am J Clin Pathol* 1966;**45**:493-6.  
39  
40
- 41 2 National Committee for Clinical Laboratory Standards. Performance standards for  
42 antimicrobial disk susceptibility test. *Tentative standard, M2-T4*, 1988;vol 8. National  
43 Committee for Clinical Laboratory Standards, Villanova, Pa.  
44  
45  
46  
47  
48
- 49 3 National Committee for Clinical Laboratory Standards. Methods for dilution  
50 antimicrobial susceptibility test for bacteria that grow aerobically. *Tentative standard,*  
51 *M7-T2*, 1988; vol. 8. National Committee for Clinical Laboratory Standards,  
52 Villanova, Pa.  
53  
54  
55  
56  
57  
58  
59  
60

- 1  
2  
3  
4 Ericsson HM, Sherris JC. Antibiotic sensitivity testing. Report of an international  
5 collaborative study. *Acta Pathol Microbiol Scand* 1971;**217** Sect. B Suppl:1-90.  
6  
7  
8  
9  
10  
11  
12  
13  
14  
15  
16  
17  
18  
19  
20  
21  
22  
23  
24  
25  
26  
27  
28  
29  
30  
31  
32  
33  
34  
35  
36  
37  
38  
39  
40  
41  
42  
43  
44  
45  
46  
47  
48  
49  
50  
51  
52  
53  
54  
55  
56  
57  
58  
59  
60
- 4 Ericsson HM, Sherris JC. Antibiotic sensitivity testing. Report of an international collaborative study. *Acta Pathol Microbiol Scand* 1971;**217** Sect. B Suppl:1-90.
- 5 Bell SM. The Calibrated Dichotomous Sensitivity (CDS) disc method of antibiotic sensitivity testing. *Pathology* 1975;**7** Suppl:1-48.
- 6 Bala M, Ray K, Gupta SM, *et al.* Changing trends of antimicrobial susceptibility pattern of *Neisseria gonorrhoeae* in India and the emergence of ceftriaxone less susceptible *N. gonorrhoeae* strains. *J Antimicrob Chemother* 2007;**60**:582-6.
- 7 Unemo M, Golparian D, Syversen G, *et al.* Two cases of verified clinical failures using internationally recommended first-line cefixime for gonorrhoea treatment, Norway, 2010. *Euro Surveill* 2010;**15**(47):pii=19721.
- 8 Ohnishi M, Golparian D, Shimuta K, *et al.* Is *Neisseria gonorrhoeae* initiating a future era of untreatable gonorrhea? Detailed characterization of the first strain with high-level resistance to ceftriaxone. *Antimicrob Agents Chemother* 2011;**55**:3538-45.
- 9 Sanchez ML, Barrett MS, Jones RN. The Etest applied to susceptibility test of gonococci, multiple-resistant enterococci and Entobacteriaceae producing potent beta-lactamases. *Diagn Microbiol Infect Dis* 1992;**15**:459-63.
- 10 Dyck EV, Smet H, Piot P. Comparison of E test with agar dilution for antimicrobial susceptibility testing of *Neisseria gonorrhoeae*. *J Clin Microbiol* 1994;**32**:1586-8.
- 11 Yeung KH, Ng LK, Dillon JA. Evaluation of Etest for testing antimicrobial susceptibilities of *Neisseria gonorrhoeae* isolates with different growth media. *J Clin Microbiol* 1993;**31**:3053-5.

- 1  
2  
3  
4 12 Bala M, Tapsall JW, Limnios A, *et al.* Experience with an external quality assurance  
5 scheme for antimicrobial susceptibility testing of *Neisseria gonorrhoeae* in India,  
6 2001–2007. *Epidemiol Infect* 2010;**138**:69–75.  
7  
8  
9  
10  
11 13 Bala M, Ray K, Gupta S. Comparison of disc diffusion results with minimum  
12 inhibitory concentration (MIC) values for antimicrobial susceptibility testing of  
13 *Neisseria gonorrhoeae*. *Indian J Med Res* 2005;**122**:48-51.  
14  
15  
16  
17  
18 14 Limnios A, Tapsall J, Kahlmeter J, *et al.* Cefpodoxime 10 µg disc screening test for  
19 detection of *Neisseria gonorrhoeae* with mosaic PBP2 and decreased susceptibility to  
20 extended-spectrum cephalosporins for public health purposes. *APMIS* 2011;**119**:356-  
21 63.  
22  
23  
24  
25  
26  
27  
28 15 Laboratory diagnosis of gonorrhoea. *WHO Regional Publication, South East Asia*  
29 *series no 33*: World Health Organisation, Geneva, 1999.  
30  
31 <http://w3.whosea.org/book33/> [accessed 22 December, 2011]  
32  
33  
34  
35  
36 16 Bell SM, Pham JN, Fisher GT. Antibiotic susceptibility testing by the CDS method. *A*  
37 *manual for medical and veterinary laboratories*. Fifth edition. 2009; P42-58.  
38  
39 <http://web.med.unsw.edu.au/cdstest> [accessed 22 December, 2011]  
40  
41  
42  
43 17 Clinical and Laboratory Standards Institute (CLSI). Performance standards for  
44 antimicrobial susceptibility testing. Seventeenth Informational Supplement. *CLSI*  
45 *document M100-S17*. Wayne, USA: Clinical and Laboratory Standards Institute 2007.  
46  
47  
48  
49  
50  
51 18 U.S. Food and Drug Administration. Class II Special Controls Guidance Document:  
52 Antimicrobial Susceptibility Test (AST) Systems. U.S. Department of Health and  
53 Human Services Food and Drug Administration, Center for Devices and Radiological  
54  
55  
56  
57  
58  
59  
60



Health. Issued March 5, 2007.

<http://www.fda.gov/MedicalDevices/DeviceRegulationandGuidance/GuidanceDocuments/ucm080187.htm> [accessed 28 December, 2011]

- 19 Biedenbach DJ, Jones RN. Comparative Assessment of Etest for Testing Susceptibilities of *Neisseria gonorrhoeae* to Penicillin, Tetracycline, Ceftriaxone, Cefotaxime, and Ciprofloxacin: Investigation Using 510(k) Review Criteria, recommended by the Food and Drug Administration. *J Clin Microbiol* 1996;**32**:14-7.
- 20 Guoming L, Qun C, Shengchun W. Resistance of *Neisseria gonorrhoeae* epidemic strains to antibiotics: report of resistant isolates and surveillance in Zhanjiang, China: 1998 to 1999. *Sex Transm Dis* 2000;**27**:115-8.
- 21 Jones RN, Gerlach EH, Koontz FP, *et al.* Development of *Neisseria gonorrhoeae* in vitro susceptibility test methods for cefixime including quality control guidelines. *Diagn Microbiol Infect Dis* 1990;**14**:383-8.

1  
2  
3  
4  
5  
6  
7  
8  
9  
10  
11  
12  
13  
14  
15  
16  
17  
18  
19  
20  
21  
22  
23  
24  
25  
26  
27  
28  
29  
30  
31  
32  
33  
34  
35  
36  
37  
38  
39  
40  
41  
42  
43  
44  
45  
46  
47  
48  
49  
50  
51  
52  
53  
54  
55  
56  
57  
58  
59  
60

**Research Check List**

- Article type
- Title
- Author names
- Author affiliations, and corresponding author’s full details
- Article summary
- Abstract
- Keywords
- Study approval
- Patient consent
- Funding statement
- Competing interests
- Contributor statement

For peer review only



**Comparative assessment of CDS, CLSI and Etest techniques  
for antimicrobial susceptibility testing of Neisseria  
gonorrhoeae: A six year study**

|                                 |                                                                                                                                                                                                                                                                                     |
|---------------------------------|-------------------------------------------------------------------------------------------------------------------------------------------------------------------------------------------------------------------------------------------------------------------------------------|
| Journal:                        | <i>BMJ Open</i>                                                                                                                                                                                                                                                                     |
| Manuscript ID:                  | bmjopen-2012-000969.R1                                                                                                                                                                                                                                                              |
| Article Type:                   | Research                                                                                                                                                                                                                                                                            |
| Date Submitted by the Author:   | 20-Apr-2012                                                                                                                                                                                                                                                                         |
| Complete List of Authors:       | Singh, Vikram; VMMC and Safdarjung Hospital, Apex Regional STD Centre Bala, Manju; VMMC and Safdarjung Hospital, Apex Regional STD Centre Kakran, Monika; VMMC and Safdarjung Hospital, Apex Regional STD Centre Ramesh, V.; VMMC and Safdarjung Hospital, Apex Regional STD Centre |
| <b>Primary Subject Heading</b>: | Sexual health                                                                                                                                                                                                                                                                       |
| Secondary Subject Heading:      | Diagnostics, Infectious diseases                                                                                                                                                                                                                                                    |
| Keywords:                       | Microbiology < BASIC SCIENCES, Diagnostic microbiology < INFECTIOUS DISEASES, PUBLIC HEALTH                                                                                                                                                                                         |
|                                 |                                                                                                                                                                                                                                                                                     |

SCHOLARONE™  
Manuscripts

1  
2  
3  
4  
5  
6  
7  
8  
9  
10  
11  
12  
13  
14  
15  
16  
17  
18  
19  
20  
21  
22  
23  
24  
25  
26  
27

**Comparative assessment of CDS, CLSI and Etest techniques for antimicrobial susceptibility testing of *Neisseria gonorrhoeae*: A six year study**

28  
29  
30  
31  
32  
33  
34  
35  
36  
37  
38  
39  
40  
41  
42  
43  
44  
45  
46  
47  
48  
49  
50  
51  
52  
53  
54  
55  
56  
57  
58  
59  
60

**Vikram Singh, Manju Bala, Monika Kakran and V. Ramesh**

**Apex Regional STD Teaching, Training & Research Centre, Vardhman Mahavir Medical College & Safdarjung Hospital, New Delhi, India.**

**Correspondence to:**

Dr. Manju Bala, Consultant (Microbiology) and Associate Professor, Apex Regional STD Teaching, Training & Research Centre, 5<sup>th</sup> Floor, New OPD Building, Vardhman Mahavir Medical College & Safdarjung Hospital, New Delhi, India. Telephone number: 91-11-26196740, Fax number: 91-11-26163072, Email: [manjubala\\_2@hotmail.com](mailto:manjubala_2@hotmail.com)

**Word count:** 2913 words

**Keywords:** *Neisseria gonorrhoeae*, CDS disc diffusion, CLSI, Etest, Gonococcal Antimicrobial Surveillance Programme.

**Running title:** Comparison of CDS, CLSI, Etest for susceptibility testing of *N. gonorrhoeae*

## ARTICLE SUMMARY

### Article focus

- A variety of techniques are available for antimicrobial susceptibility testing (AST) of *Neisseria gonorrhoeae*.
- The aim of this study to find a cost-effective, reliable and easily applicable microbiological method to detect antimicrobial susceptibilities of *N. gonorrhoeae* in resource poor countries.

### Key messages

- This study highlighted that the CDS technique yielded excellent category agreement with their analogous Etest MICs in comparison to CLSI technique.
- CDS offers the advantage for those laboratories that process small numbers of specimens.
- CDS technique is cost-effective, reliable and easily applicable microbiological method to detect antimicrobial susceptibilities of *Neisseria gonorrhoeae* in resource poor countries.
- This technique will facilitate enhanced antimicrobial resistance surveillance and direct and meaningful comparison of resistance data generated within different national and international laboratories.

**Strengths and limitations of this study**

- This is the first study to determine the comparability of CDS and CLSI disc diffusion method with Etest MICs and to accurately and reproducibly assess *N. gonorrhoeae* susceptibilities for penicillin, tetracycline, ceftriaxone, ciprofloxacin and spectinomycin, commonly used for susceptibility testing.
- Susceptibility testing for cefixime, cefpodoxime, gentamicin and azithromycin was performed only by one method because of non-availability of interpretation criteria for these antimicrobials or limitation of resources. Therefore, comparison of above three techniques could not be carried out for these antibiotics.

## ABSTRACT

**Background:** A variety of techniques are available for antimicrobial susceptibility testing (AST) of *Neisseria gonorrhoeae*.

**Objective:** The aim of this study was to find a cost-effective, reliable and easily applicable microbiological method to detect antimicrobial susceptibilities of *N. gonorrhoeae* in resource poor countries.

**Design:** Prospective study.

**Setting:** Male STD clinic and female STD clinic of Regional STD Teaching, Training and Research Centre, New Delhi, India.

**Participants:** *N. gonorrhoeae* isolates from all male and female patients presenting with acute gonococcal urethritis and cervical discharge.

**Material and Methods:** A total of consecutive 295 *N. gonorrhoeae* isolates during 2005 to 2010, were used to compare the CLSI and CDS disc diffusion technique with Etest by performing antimicrobial susceptibility testing in parallel for penicillin, tetracycline, ceftriaxone, ciprofloxacin and spectinomycin. WHO reference strains were used as controls.

**Results:** CDS disc diffusion zones of inhibition showed that complete percentage agreement for penicillin, ciprofloxacin and tetracycline was high with their analogous Etest MICs in comparison to CLSI technique i.e. 91.5%, 92.9%, 99.3% versus 87.5%, 88.5% and 74.9% respectively. CDS results had less number of major and minor category discrepancies in comparison to CLSI technique and CDS method showed excellent correlation coefficient ( $r = 1$ ) with Etest for all five antimicrobial agents tested in comparison to CLSI ( $r = 0.92$ ). It was very poor ( $r = 0.61$ ) by CLSI method for tetracycline.

**Conclusions** The CDS technique is an attractive alternative for *N. gonorrhoeae* susceptibility testing and is recommended for monitoring the antimicrobial susceptibility in less developed and resource poor settings to facilitate enhanced antimicrobial resistance (AMR) surveillance when the WHO Gonococcal Antimicrobial Surveillance Programme is undergoing expansion to meet the ongoing challenges of surveillance and control of gonococcal AMR.



## INTRODUCTION

Gonorrhoea caused by *Neisseria gonorrhoeae* (*N. gonorrhoeae*) is one of the most common sexually transmitted infections and is a global health problem. Uncomplicated urogenital *N. gonorrhoeae* infections can lead to epididymitis in males and salpingitis in females, conditions that are associated with infertility. In some cases localized infections can lead to haematogenic dissemination causing severe complications like sepsis, meningitis and endocarditis. The worldwide distribution of *N. gonorrhoeae* and the emergence of resistance to various antimicrobials emphasize the importance of antimicrobial resistance (AMR) surveillance of clinical gonococcal isolates.

Antimicrobial susceptibility testing (AST) may be carried out by a variety of techniques. The most commonly used methods have been the high-content disc diffusion method first described by Bauer *et al*,[1] and later modified by the National Committee for Clinical Laboratory Standards (NCCLS),[2] the broth microdilution technique as described by the NCCLS,[3] the agar dilution method described by Ericsson and Sherris,[4] and adapted by the NCCLS,[3] more recently Etest (AB Biodisk, Solna, Sweden), a modification of the disc diffusion and the agar dilution methods mentioned previously. The Etest is an impervious carrier with a continuous gradient of antimicrobial agent applied to one side of the strip. The test is performed in the same manner as the disc diffusion test, but determines a minimal inhibitory concentration (MIC) of antimicrobial agent rather than a category result based on a zone size. The Calibrated Dichotomous Sensitivity (CDS) test is a method for determining the antibiotic susceptibility of micro-organisms using agar disc diffusion and was developed in 1969 by Sydney M. Bell assisted by members of the Department of Microbiology, The Prince of Wales Hospital, Sydney, Australia. It was introduced into laboratory practice in

1  
2  
3  
4  
5  
6  
7  
8  
9 Australia in an effort to correct the unsatisfactory results of antibiotic susceptibility testing in  
10 Australia that were obtained from surveys conducted by The Royal College of Pathologists  
11 of Australia in the late 60's and early 70's.[5]  
12

13  
14 The recent emergence of *N. gonorrhoeae* isolates with decreased susceptibility and resistance  
15 to the currently recommended treatment guidelines of the Centers for Disease Control and  
16 Prevention, including extended-spectrum cephalosporins (ESC), has further established the  
17 necessity for a standardized, reliable, economical, less labor intensive and reproducible  
18 susceptibility testing method.[6-8] Previous studies with the Etest determined that results  
19 correlated well with the reference agar dilution method and that it is a useful guide for  
20 determining chemotherapy against many organisms,[9] including gonococci.[9-11] The CDS  
21 disc diffusion technique is recommended by WHO Collaborating Centre for STD, Sydney,  
22 Australia and was regarded as the only practical and affordable means of phenotypic  
23 susceptibility testing.[12] It was found to be cost-effective and more feasible during an  
24 external quality assurance scheme in routine diagnostic laboratories in developing countries  
25 like India.[12] Earlier this method was evaluated in comparison to Etest for only three  
26 antibiotics (ciprofloxacin, penicillin, and ceftriaxone) and that also on a limited number of  
27 isolates.[13] Moreover, tetracycline and spectinomycin (an alternative drug of choice for  
28 treatment of gonorrhea) were not tested in the earlier study of 2005. Recently, CDS technique  
29 has been recommended in less resourced settings for detection of decreased susceptibility to  
30 ESCs using cefpodoxime disc.[14] The purpose of this study was to determine the  
31 comparability of the Etest, CDS and Clinical and Laboratory Standards Institute (CLSI),  
32 formerly NCCLS, to accurately and reproducibly assess *N. gonorrhoeae* susceptibilities for  
33 five antibiotics commonly used for susceptibility testing, which included penicillin,  
34  
35  
36  
37  
38  
39  
40  
41  
42  
43  
44  
45  
46  
47  
48  
49  
50  
51  
52  
53  
54  
55  
56  
57  
58  
59  
60

tetracycline, ceftriaxone, spectinomycin and ciprofloxacin. The aim was also and to assess the feasibility of recommending CDS technique for its use in developing and resource poor countries. To our knowledge, this is the first study to compare the two disc diffusion methods with Etest MIC testing for above five antibiotics.

## MATERIALS AND METHODS

### *N. gonorrhoeae* isolates

A total of 295 *N. gonorrhoeae* isolates from all male and female patients presenting with acute gonococcal urethritis and cervical discharge respectively to the Regional STD Teaching, Training and Research Centre, Safdarjung Hospital, New Delhi, India from January 2005 to December 2010 were included in the study. The strains were consecutive and nonrepetitive. Methods used for isolation and identification of *N. gonorrhoeae* have been described previously.[15]

### $\beta$ -lactamase testing

*N. gonorrhoeae* isolates were tested for  $\beta$ -lactamase production by the chromogenic cephalosporin method using nitrocefin freeze dried powder (Oxoid) or nitrocefin slide (Becton, Dickinson and Company, Maryland).[15]

### Antimicrobial susceptibility testing

#### Inoculum Preparation

The inoculum was prepared from 18 to 24 hour pure culture on chocolate agar medium and a homogenized suspension was prepared in 5 ml of sterile saline solution and turbidity was adjusted to an equivalent of 0.5 McFarland standard. Same suspension was used for the

following three methods of antimicrobial susceptibility testing within 15 minutes. All the following three susceptibility tests were run simultaneously on same day.

*CDS disc diffusion technique*

Antibiotic susceptibility testing of all the 295 *N. gonorrhoeae* isolates was performed by the CDS technique on chocolate agar plates (Columbia agar base, HiMedia Laboratories Pvt. Ltd., Mumbai, India) with low concentration antibiotic discs (Oxoid Basingstoke, UK). Six antibiotics with concentrations recommended i.e. penicillin (0.5 IU), tetracycline (10µg), ceftriaxone (0.5µg), ciprofloxacin (1µg), spectinomycin (100µg) and nalidixic acid (30µg) were used as per standard methodology.[16] The strains were interpreted as susceptible, less susceptible and resistant.[16] Nalidixic acid was used only to identify isolates less susceptible to ciprofloxacin and results of susceptibility to this antibiotic are not included.

*CLSI disc diffusion method*

Same inoculum was used for this method, which was performed using GC agar base (Oxoid Ltd., Basingstoke, Hampshire, England) with 1% isovitalex or vitamino growth supplement (Hi Media Laboratories Pvt. Ltd., Mumbai, India) with higher disc concentration (HiMedia Laboratories Pvt. Ltd., Mumbai, India) recommended by CLSI i.e. penicillin (10 IU), tetracycline (30µg), ceftriaxone (30µg), ciprofloxacin (5µg), spectinomycin (100µg) and nalidixic acid (30µg) were used.[17] The strains were defined as susceptible, less susceptible and resistant.[17]

*Etest Minimum Inhibitory Concentration (MIC) determination*

The MICs of all the isolates for penicillin, tetracycline, ciprofloxacin, spectinomycin, and ceftriaxone were determined by the Etest method (AB Biodisk, Solna, Sweden) on GC agar

base with 1% isovitalax or vitamino growth supplement. The Etest was performed as specified in the manufacturer's product package insert. The strains were defined as susceptible, less susceptible and resistant. [17] The Etest method was selected as the reference method for comparison of results of CDS and CLSI techniques.

### Control strains

*N. gonorrhoeae* WHO reference strains C, G, K, L, O and Q were used as controls for disc diffusion and Etest MIC testing. The WHO control strains K and L with decreased susceptibility to extended-spectrum cephalosporins were included in 2010 as these became available to this centre only by the end of 2009. [18] This centre participated in External Quality assurance Scheme (EQAS) of gonococcal AST from 2001 to 2010 conducted by the Neisseria Reference Laboratory, WHO Collaborating Centre for STD, Sydney, Australia. EQAS results every year showed almost 100% agreement with the reference laboratory expected results, except some disagreement of results was observed for one strain for ceftriaxone in 2002, 2007, 2008, 2010 and for one strain for penicillin in 2004 and 2010. On repeat testing, 100% agreement was observed.

### Statistical analysis

Discrepancies were differentiated into three categories, minor (involving the less susceptible category), major (false susceptibility) and very major (false resistant) which are defined by

U.S. Department of Health and Human Services Food and Drug Administration. [19]

Complete and essential percent agreement between the reference and test method was evaluated. The complete percent agreement is the percentage of isolates tested by the test method which gave the same category as those tested by the reference method. The essential percent agreement value is the percentage of agreement obtained between the reference and

test method when minor discrepancies are ignored. .[19] Pearson correlation coefficient ( $r$  values) was generated for each antimicrobial agent indexed by susceptibility test method. Statistical correlation result was considered perfect for the correlation coefficient ( $r$  value) of 1.00, desirable for  $\geq 0.90$  and acceptable for  $\geq 0.80$ .

## RESULTS

The incidence of susceptible, less susceptible and resistant isolates differed following the performance of both the disc diffusion assays and Etest (Table 1). Table 2 and 3 show the comparison of discrepancies and agreement of CDS and CLSI method with Etest for five different antibiotics. In overall, the rates of discrepancies for different antibiotics differed in both the CDS and CLSI technique on comparison to Etest method. On comparison of CDS method with Etest the highest discrepancy rate was observed for penicillin (8.5%) and lowest for spectinomycin (0) and overall complete agreement was 82.0%. While, for CLSI method highest discrepancy rate was detected for tetracycline (25.1%) and lowest for spectinomycin (0) and overall complete agreement was 49.5%. A total no. of minor and major error was 133 and 16 respectively for CLSI while for CDS they were only 51 and 2 respectively. Complete percentage agreement for penicillin, ciprofloxacin and tetracycline by CDS test was high in comparison to CLSI technique. It was found to be same for spectinomycin and ceftriaxone. Pearson's correlation coefficient was perfect for all the antibiotics by the CDS method in comparison to CLSI technique i.e.  $r$  value 1.00 versus 0.92. Moreover, it was very poor (0.61) by CLSI method for tetracycline. Results with individual antibiotics by the three techniques were as follows:

### Penicillin

1  
2  
3  
4  
5  
6  
7  
8  
9 Out of 295 isolates, 34 (11.5%), 156 (52.9%), and 105 (35.6%) isolates were interpreted as  
10 susceptible, less susceptible and resistant respectively by the Etest method (Table 1). On  
11 comparison of CDS and CLSI with Etest method, minor discrepancies were observed to be  
12 8.5% and 12.5% respectively while no major or very major discrepancies were found. The  
13 complete percent agreement of penicillin for the CDS and CLSI method with Etest was  
14 91.5% & 87.5% respectively and the essential agreement for both was found as 100% (Table  
15 2 and 3). Penicillin demonstrated high level of correlation coefficient (0.99) on comparison  
16 of both the methods. Antibiotic susceptibility by the Etest method revealed that 105 (35.6%)  
17 isolates were resistant to penicillin, out of which 95 (32.2%) were  $\beta$ -lactamase positive and  
18 10 (3.4%) were having chromosomally mediated resistance. Out of remaining 190 (64.4%)  
19 isolates, 156 (52.9%) had reduced susceptibility to penicillin and 34 (11.5%) were  
20 susceptible to penicillin.  
21  
22

### 23 **Ciprofloxacin**

24 Only 1 (0.3%) isolate was found susceptible for ciprofloxacin with the Etest method. The no.  
25 of less susceptible and resistant isolates were 48 (16.3%) and 246 (83.4%) respectively  
26 (Table 1). Out of 246 resistant isolates, 102 (34.6%) were observed to have high level  
27 resistance ( $MIC \geq 4$ ). On comparison of Etest method with CDS and CLSI methods, minor  
28 discrepancies were observed as 7.1% and 11.5% respectively. The complete agreement for  
29 both the CDS and CLSI was 92.9% and 88.5% respectively. No major and very major  
30 discrepancies occurred. Person's correlation coefficient was excellent ( $r = 0.99$ ) for both the  
31 methods (Table 2 and 3).  
32

### 33 **Ceftriaxone**

1  
2  
3  
4  
5  
6  
7  
8  
9  
10  
11  
12  
13  
14  
15  
16  
17  
18  
19  
20  
21  
22  
23  
24  
25  
26  
27  
28  
29  
30  
31  
32  
33  
34  
35  
36  
37  
38  
39  
40  
41  
42  
43  
44  
45  
46  
47  
48  
49  
50  
51  
52  
53  
54  
55  
56  
57  
58  
59  
60

Out of 295 isolates, 283 (95.9%) were susceptible and remaining 12 (4.1%) were observed to have decreased susceptibility for ceftriaxone by the Etest method (Table 1). On comparison of CDS and CLSI methods with the Etest method, 1.7% and 1.4% minor discrepancy were observed respectively. The complete percent agreement for ceftriaxone was 98.3% and 98.6% for both the methods. Essential agreement for both the methods was 100% with the Etest method (Table 2 and 3). Person's correlation coefficient was perfect ( $r = 1$ ) for both the methods.

### **Spectinomycin**

All the isolates were susceptible to spectinomycin, by all the three methods (Table 1). This resulted in 100% of essential and complete agreement on comparison of the CDS and CLSI method with the Etest method (Table 2,3).

### **Tetracycline**

Out of 295 isolates, 58 (19.7%) were Tetracycline-resistant *N. gonorrhoeae* (TRNG) while 237 (80.3%) were Not-Tetracycline-resistant *N. gonorrhoeae* (N-TRNG) by the Etest method (Table 1). Out of 237 N-TRNG isolates, 116 (39.3%), 91 (30.8%) and 30 (10.2 %) were observed as susceptible, less susceptible and resistant respectively. On comparison of N-TRNG isolates by the CLSI technique with the Etest method, 5.4% and 19.7% major and minor discrepancies were found respectively. The complete and essential percentage agreement for the CLSI technique was 74.9% and 94.6% respectively. By the CDS method 60 (20.3%) isolates were observed to be TRNG and 235 (79.7%) N-TRNG. Only 2 (0.7%) isolates were found under major discrepancy on comparison of the CDS method with Etest method. Both complete and essential percent agreement between CDS and Etest method was 99.3%. Tetracycline demonstrated perfect correlation coefficient ( $r = 1$ ) for CDS and Etest



method on the basis of TRNG and N-TRNG category comparison. However, for comparison of 80.3% N-TRNG isolates with Etest method, it was observed to be very poor ( $r = 0.61$ ) by the CLSI technique (Table 2 and 3).

For peer review only

Table 1. Results of susceptibility testing of 295 *N. gonorrhoeae* isolates for five antibiotics by three techniques from 2005-2010.

| Method | Penicillin |        |        | Ciprofloxacin |        |        | Spectinomycin |    |   | Ceftriaxone |       |   | Tetracycline |        |        | Tetracycline |        |
|--------|------------|--------|--------|---------------|--------|--------|---------------|----|---|-------------|-------|---|--------------|--------|--------|--------------|--------|
|        | S          | LS     | R      | S             | LS     | R      | S             | LS | R | S           | LS    | R | S            | LS     | R      | TRNG         | N-TRNG |
| Etest  | 34         | 156    | 105    | 1             | 48     | 246    | 295           | -  | 0 | 283         | 12    | 0 | 116          | 91     | 30     | 58           | 237    |
|        | (11.5)     | (52.9) | (35.6) | (0.3)         | (16.3) | (83.4) | (100)         |    |   | (95.9)      | (4.1) |   | (39.3)       | (30.8) | (10.2) | (19.7)       | (80.3) |
| CDS    | 30         | 151    | 114    | 1             | 27     | 267    | 295           | -  | 0 | 282         | 13    | 0 | -            | -      | -      | 60           | 235    |
|        | (10.2)     | (51.2) | (38.6) | (0.3)         | (9.2)  | (90.5) | (100)         |    |   | (95.6)      | (4.4) |   |              |        |        | (20.3)       | (79.7) |
| CLSI   | 21         | 157    | 117    | 1             | 64     | 230    | 295           | 0  | 0 | 283         | 12    | 0 | 80           | 103    | 64     | 48           | 247    |
|        | (7.1)      | (53.2) | (39.7) | (0.3)         | (21.7) | (78.0) | (100)         |    |   | (95.9)      | (4.1) |   | (27.1)       | (35.9) | (21.7) | (16.3)       | (83.7) |

S, Susceptible; LS, Less susceptible; R, Resistant; TRNG, Tetracycline Resistant *N. gonorrhoeae*; N-TRNG, Not-TRNG.

Table 2. Comparison of discrepancies and agreement between the CDS and Etest method for 295 *N. gonorrhoeae* isolates.

| Antimicrobial<br>Agent | No. of discrepancies |       |            | % agreement |           | Correlation coefficient<br>(r) |
|------------------------|----------------------|-------|------------|-------------|-----------|--------------------------------|
|                        | Minor                | Major | Very major | Complete    | Essential |                                |
|                        | Penicillin           | 25    | 0          | 0           | 91.5      | 100                            |
| Ciprofloxacin          | 21                   | 0     | 0          | 92.9        | 100       | 0.99                           |
| Spectinomycin          | 0                    | 0     | 0          | 100         | 100       | 1.0                            |
| Ceftriaxone            | 5                    | 0     | 0          | 98.3        | 100       | 1.0                            |
| Tetracycline           | 0                    | 2     | 0          | 99.3        | 99.3      | 1.0                            |
| All                    | 51                   | 2     | 0          | 82.0        | 99.3      | 1.0                            |

Table 3. Comparison of discrepancies and agreement between the CLSI and Etest method for 295 *N. gonorrhoeae* isolates.

| Antimicrobial Agent | No. of discrepancies |       |            | % agreement |           | Correlation coefficient ( r ) |
|---------------------|----------------------|-------|------------|-------------|-----------|-------------------------------|
|                     | Minor                | Major | Very major | Complete    | Essential |                               |
|                     | Penicillin           | 37    | 0          | 0           | 87.5      |                               |
| Ciprofloxacin       | 34                   | 0     | 0          | 88.5        | 100       | 0.99                          |
| Spectinomycin       | 0                    | 0     | 0          | 100         | 100       | 1.0                           |
| Ceftriaxone         | 4                    | 0     | 0          | 98.6        | 100       | 1.0                           |
| Tetracycline        | 58                   | 16    | 0          | 74.9        | 94.6      | 0.61                          |
| All                 | 133                  | 16    | 0          | 49.5        | 94.6      | 0.92                          |

## DISCUSSION

An important and essential measure for monitoring the effectiveness of recommended drugs for the treatment of gonorrhoea is surveillance of the in vitro antimicrobial susceptibilities of clinical isolates of *N. gonorrhoeae*. The recommend procedure for antimicrobial susceptibility testing of gonococci is determination of the MICs by an agar dilution technique.[17] However, this method ~~is laborious and cumbersome, is difficult to standardize, and~~ is performed only in research laboratories, mainly in industrialized countries. Moreover, agar dilution technique requiring a number of isolates at one time is not a feasible technique for determining MIC for this organism because the numbers of isolates even in a central level laboratory are very few and *N. gonorrhoeae* being a fastidious organism is difficult to store for long periods. Etest in a number of studies has already been shown to be an effective alternative and a more appropriate method than the agar dilution technique for MIC determination for *N. gonorrhoeae* by laboratories in developing countries, where resistance of gonococci to antimicrobial agents is a major public health problem.[9-11, 2019]

Therefore, the Etest method was considered as the reference method in this study for comparison of MIC results with CDS and CLSI disc diffusion techniques, as an excellent essential agreement (92-99% ) was demonstrated between Etest and standard agar dilution technique for the antibiotics commonly used for susceptibility testing of *N. gonorrhoeae*, [2019] and these percentages were above the recommended limitations ( $\geq 90\%$ ) set by the Food and Drug Administration's *Review Criteria for Assessment of Antimicrobial Susceptibility Devices*, confirming that the Etest satisfactorily approximates the agar reference method. [2019] Yeung KH *et al*, [11] also reported 98% overall agreement between Etest and the agar dilution method.

1  
2  
3  
4  
5  
6  
7  
8  
9 The original purpose of this study was to assess reliability and comparability of the CDS and  
10 CLSI method to predict the interpretative categories of susceptibility as compared with  
11 standard Etest method. However, because all test procedures were done from ~~a single~~the  
12 same inoculum and were carefully controlled, we had a unique opportunity to compare the  
13 two methods with Etest method which was used as ~~gold-reference~~ standard and the Etest  
14 MIC values were supported by satisfactory Quality Control (QC) measures. Protocols in both  
15 the disc diffusion techniques differ in their choices of test medium, antibiotic disc content,  
16 and interpretative breakpoint criteria. Zones of inhibition delineating susceptible, less  
17 susceptible and resistant isolates from disc diffusion procedures must correlate with  
18 corresponding MICs. In the present study, CDS results correlation was excellent with Etest  
19 MICs which had less number of major and minor category discrepancies in comparison to  
20 CLSI technique i.e. 2 and 52 versus 16 and 133. Complete percent agreement of CDS with  
21 Etest was 82.0% while for CLSI method it was 49.5% which was very poor agreement. CDS  
22 method showed excellent correlation coefficient ( $r = 1$ ) with Etest for all five antimicrobial  
23 agents tested in comparison to CLSI ( $r = 0.92$ ). Previously study of our centre had shown  
24 96.9 percent agreement for ceftriaxone for comparison of CDS with Etest technique.[13]  
25 Interpretation of disc inhibition zones in CDS method was easier than in the CLSI technique  
26 especially when the zone size was near the breakpoint. Double zone of inhibition was  
27 observed many times in CLSI technique leading to difficulty in interpretation.  
28 In an another study from WHO Collaborating Centre for STD in Australia and Sweden, the  
29 correlation between results of CDS disc diffusion testing (cefpodoxime), and MIC  
30 determinations with agar dilution and Etest using cefpodoxime, cefixime and ceftriaxone for  
31 the detection of decreased ESC susceptibility in *N. gonorrhoeae* was investigated.[14] CDS  
32  
33  
34  
35  
36  
37  
38  
39  
40  
41  
42  
43  
44  
45  
46  
47  
48  
49  
50  
51  
52  
53  
54  
55  
56  
57  
58  
59  
60

1  
2  
3  
4  
5  
6  
7  
8  
9 technique using cefpodoxime 10 µg disc was shown to provide high sensitivity for detection  
10 of gonococcal isolates with decreased ESC susceptibility and it was suggested that this disc  
11 test will make it possible to provide AMR surveillance data also from less-developed and/or  
12 less-resourced settings, where disc testing is the only practical and affordable means of AMR  
13 testing.[14]

14  
15  
16  
17  
18 Our findings reveal poor correlation between CLSI disc diffusion results and Etest MICs,  
19 most notably for tetracycline, penicillin and ciprofloxacin. Further, if tetracycline were  
20 removed from the CLSI analysis, then the correlation coefficients between the two methods  
21 and the Etest were identical. It is the reported in the literature that there are problems on the  
22 reproducibility of results with tetracycline, especially when different media are used.  
23  
24  
25  
26  
27

28 Excellent correlation was observed for ceftriaxone and spectinomycin, reason being that  
29 resistance was not reported for these antimicrobial agents in the present study. Emergence of  
30 resistance to both these antibiotics may lead to poor agreement between CLSI and Etest. Our  
31 results compared well with that from China,[~~21~~20] where poor per cent agreement was  
32 reported between the CLSI and agar dilution technique for MIC testing. It was 73.6%, 72.3%  
33 and 71.4% for ciprofloxacin, penicillin and ceftriaxone respectively. Given the disparity  
34 among susceptibility test results presented here, errors associated with susceptibility testing  
35 may result in the unwarranted utilization or elimination of these antibiotics as part of possible  
36 treatment regimens.

37  
38  
39  
40  
41  
42  
43  
44  
45 The results of our study suggest that CDS technique could be reliably used in resistance  
46 surveillance programmes for public health purposes and it can be recommended for use by all  
47 the focal point laboratories in WHO GASP network in SEAR because of its excellent  
48 agreement with Etest results and also it was simple, cost-effective and results are easier to  
49  
50  
51  
52  
53  
54  
55  
56  
57  
58  
59  
60

1  
2  
3  
4  
5  
6  
7  
8  
9 interpret. In many developing countries in SEAR and other regions, most afflicted by  
10 gonorrhoea and AMR, MIC determination using agar dilution method or Etest is not readily  
11 accessible or affordable. Especially in those countries, the availability of a sensitive, rapid,  
12 inexpensive, easily performed and effective disc test can be highly valuable. Use of a  
13 standardized agar diffusion method is practical in these situations and allows fast and  
14 reproducible results for clinical microbiology laboratories if standards are observed.[22+]  
15  
16 To conclude, this is the first study to compare CDS and CLSI disk diffusion method with  
17 Etest and the CDS technique yielded excellent category agreement results when compared  
18 with the Etest. The data obtained in the present study suggest that the CDS technique is an  
19 accurate alternative method for susceptibility testing of *N. gonorrhoeae* for various  
20 antimicrobial agents. It is much less cumbersome than the current reference method because  
21 of its simplicity, less consumption of media and glassware and is a more appropriate  
22 technique in settings with minimal microbiological resources. CDS offers the advantage for  
23 those laboratories that process small numbers of specimens and these laboratories could  
24 determine the susceptibilities of gonococcal isolates reasonably accurately. This could  
25 facilitate direct and meaningful comparison of resistance data generated within different  
26 national and international laboratories.  
27  
28  
29  
30  
31  
32  
33  
34  
35  
36  
37  
38  
39  
40  
41  
42

43 **Acknowledgements:** The authors are indebted to ~~A/Professor Prof.~~ John W. Tapsall ~~AM~~, Ms.  
44 Athena ~~E.~~ Limnios and ~~A/Professor Dr.~~ Monica M. Lahra, WHO collaborating centre for  
45 STD, Department of Microbiology, The Prince of Wales Hospital, Sydney, Australia for  
46 supplying WHO Reference strains and low concentration antibiotic discs. The support of  
47  
48  
49  
50  
51  
52  
53  
54  
55  
56  
57  
58  
59  
60



WHO and NACO is gratefully acknowledged. We are grateful to Mrs. Leelamma Peter and Mr. Naveen Chandra Joshi for their excellent technical assistance.

**Funding:** Nil.

**Competing interests:** None declared.

**Ethical approval:** Not required.

**Contributors:** MB designed the study and coordinated the work. VS and MB carried out analysis of data and preparation of manuscript. MK participated in data analysis and VR collaborated in the writing of the manuscript.

There is no additional data available.

### Copyright

The Corresponding Author has the right to grant on behalf of all authors and does grant on behalf of all authors, an exclusive licence (or non exclusive for government employees) on a worldwide basis to the BMJ Publishing Group Ltd to permit this article (if accepted) to be published in STI and any other BMJPG products and sub-licences such use and exploit all subsidiary rights, as set out in our licence (<http://sti.bmjournals.com/ifora/licence.pdf>).

### REFERENCES

- 1 Bauer AW, Kirby WM, Sherris JC, *et al.* Antibiotic susceptibility testing by a standardized single disk method. *Am J Clin Pathol* 1966;**45**:493-6.

- 1  
2  
3  
4  
5  
6  
7  
8  
9 2 National Committee for Clinical Laboratory Standards. Performance standards for  
10 antimicrobial disk susceptibility test. *Tentative standard, M2-T4*, 1988;vol 8. National  
11 Committee for Clinical Laboratory Standards, Villanova, Pa.  
12
- 13  
14 3 National Committee for Clinical Laboratory Standards. Methods for dilution  
15 antimicrobial susceptibility test for bacteria that grow aerobically. *Tentative standard,*  
16 *M7-T2*, 1988; vol. 8. National Committee for Clinical Laboratory Standards,  
17 Villanova, Pa.  
18  
19
- 20  
21 4 Ericsson HM, Sherris JC. Antibiotic sensitivity testing. Report of an international  
22 collaborative study. *Acta Pathol Microbiol Scand* 1971;**217** Sect. B Suppl:1-90.  
23  
24
- 25  
26 5 Bell SM. The Calibrated Dichotomous Sensitivity (CDS) disc method of antibiotic  
27 sensitivity testing. *Pathology* 1975;**7** Suppl:1-48.  
28  
29
- 30  
31 6 Bala M, Ray K, Gupta SM, *et al.* Changing trends of antimicrobial susceptibility  
32 pattern of *Neisseria gonorrhoeae* in India and the emergence of ceftriaxone less  
33 susceptible *N. gonorrhoeae* strains. *J Antimicrob Chemother* 2007;**60**:582-6.  
34  
35
- 36  
37 7 Unemo M, Golparian D, Syversen G, *et al.* Two cases of verified clinical failures  
38 using internationally recommended first-line cefixime for gonorrhoea treatment,  
39 Norway, 2010. *Euro Surveill* 2010;**15**(47):pii=19721.  
40  
41
- 42  
43 8 Ohnishi M, Golparian D, Shimuta K, *et al.* Is *Neisseria gonorrhoeae* initiating a  
44 future era of untreatable gonorrhea? Detailed characterization of the first strain with  
45 high-level resistance to ceftriaxone. *Antimicrob Agents Chemother* 2011;**55**:3538-45.  
46  
47  
48  
49  
50  
51  
52  
53  
54  
55  
56  
57  
58  
59  
60

- 1  
2  
3  
4  
5  
6  
7  
8  
9 9 Sanchez ML, Barrett MS, Jones RN. The Etest applied to susceptibility test of  
10 gonococci, multiple-resistant enterococci and Entobacteriaceae producing potent  
11 beta-lactamases. *Diagn Microbiol Infect Dis* 1992;**15**:459–63.  
12  
13  
14  
15 10 Dyck EV, Smet H, Piot P. Comparison of E test with agar dilution for antimicrobial  
16 susceptibility testing of *Neisseria gonorrhoeae*. *J Clin Microbiol* 1994;**32**:1586–8.  
17  
18  
19 11 Yeung KH, Ng LK, Dillon JA. Evaluation of Etest for testing antimicrobial  
20 susceptibilities of *Neisseria gonorrhoeae* isolates with different growth media. *J Clin*  
21 *Microbiol* 1993;**31**:3053–5.  
22  
23  
24  
25 12 Bala M, Tapsall JW, Limnios A, *et al*. Experience with an external quality assurance  
26 scheme for antimicrobial susceptibility testing of *Neisseria gonorrhoeae* in India,  
27 2001–2007. *Epidemiol Infect* 2010;**138**:69–75.  
28  
29  
30  
31 13 Bala M, Ray K, Gupta S. Comparison of disc diffusion results with minimum  
32 inhibitory concentration (MIC) values for antimicrobial susceptibility testing of  
33 *Neisseria gonorrhoeae*. *Indian J Med Res* 2005;**122**:48–51.  
34  
35  
36  
37 14 Limnios A, Tapsall J, Kahlmeter J, *et al*. Cefpodoxime 10 µg disc screening test for  
38 detection of *Neisseria gonorrhoeae* with mosaic PBP2 and decreased susceptibility to  
39 extended-spectrum cephalosporins for public health purposes. *APMIS* 2011;**119**:356-  
40 63.  
41  
42  
43  
44  
45 15 Laboratory diagnosis of gonorrhoea. *WHO Regional Publication, South East Asia*  
46 *series no 33*: World Health Organisation, Geneva, 1999.  
47 <http://w3.whosea.org/book33/> [accessed 22 December, 2011]  
48  
49  
50  
51  
52  
53  
54  
55  
56  
57  
58  
59  
60

- 1  
2  
3  
4  
5  
6  
7  
8  
9 16 Bell SM, Pham JN, Fisher GT. Antibiotic susceptibility testing by the CDS method. *A*  
10 *manual for medical and veterinary laboratories*. Fifth edition. 2009; P42-58.  
11 <http://web.med.unsw.edu.au/cdstest> [accessed 22 December, 2011]  
12  
13  
14  
15 17 Clinical and Laboratory Standards Institute (CLSI). Performance standards for  
16 antimicrobial susceptibility testing. Seventeenth Informational Supplement. *CLSI*  
17 *document M100-S17*. Wayne, USA: Clinical and Laboratory Standards Institute 2007.  
18  
19  
20  
21 18 [Unemo M, Fasth O, Fredlund H, et al. Phenotypic and genetic characterization of the](#)  
22 [2008 WHO Neisseria gonorrhoeae reference strain panel intended for global quality](#)  
23 [assurance and quality control of gonococcal antimicrobial resistance surveillance for](#)  
24 [public health purposes. \*J Antimicrob Chemother\* 2009;\*\*63\*\*:1142–51.](#)  
25  
26  
27  
28  
29 19. U.S. Food and Drug Administration. Class II Special Controls Guidance Document:  
30 Antimicrobial Susceptibility Test (AST) Systems. U.S. Department of Health and  
31 Human Services Food and Drug Administration, Center for Devices and Radiological  
32 Health. Issued March 5, 2007.  
33 [http://www.fda.gov/MedicalDevices/DeviceRegulationandGuidance/GuidanceDocum](http://www.fda.gov/MedicalDevices/DeviceRegulationandGuidance/GuidanceDocuments/ucm080187.htm)  
34 [ents/ucm080187.htm](http://www.fda.gov/MedicalDevices/DeviceRegulationandGuidance/GuidanceDocuments/ucm080187.htm) [accessed 28 December, 2011]  
35  
36  
37  
38  
39  
40 ~~20~~<sup>19</sup> Biedenbach DJ, Jones RN. Comparative Assessment of Etest for Testing  
41 Susceptibilities of *Neisseria gonorrhoeae* to Penicillin, Tetracycline, Ceftriaxone,  
42 Cefotaxime, and Ciprofloxacin: Investigation Using 510(k) Review Criteria,  
43 recommended by the Food and Drug Administration. *J Clin Microbiol* 1996;**32**14-7.  
44  
45  
46  
47  
48 21<sup>0</sup> Guoming L, Qun C, Shengchun W. Resistance of *Neisseria gonorrhoeae* epidemic  
49 strains to antibiotics: report of resistant isolates and surveillance in Zhanjiang, China:  
50 1998 to1999. *Sex Transm Dis* 2000;**27**:115-8.  
51  
52  
53  
54  
55  
56  
57  
58  
59  
60

Formatted: Font: Bold

- 1  
2  
3  
4  
5  
6  
7  
8  
9 | **22+** Jones RN, Gerlach EH, Koontz FP, *et al.* Development of *Neisseria gonorrhoeae* in  
10 vitro susceptibility test methods for cefixime including quality control guidelines.  
11  
12 *Diagn Microbiol Infect Dis* 1990;**14**:383-8.  
13  
14  
15  
16  
17  
18  
19  
20  
21  
22  
23  
24  
25  
26  
27  
28  
29  
30  
31  
32  
33  
34  
35  
36  
37  
38  
39  
40  
41  
42  
43  
44  
45  
46  
47  
48  
49  
50  
51  
52  
53  
54  
55  
56  
57  
58  
59  
60

1  
2  
3  
4  
5  
6  
7  
8  
9  
10  
11  
12  
13  
14  
15  
16  
17  
18  
19  
20  
21  
22  
23  
24  
25  
26  
27  
28  
29  
30  
31  
32  
33  
34  
35  
36  
37  
38  
39  
40  
41  
42  
43  
44  
45  
46  
47  
48  
49  
50  
51  
52  
53  
54  
55  
56  
57  
58  
59  
60

**Research Check List**

- Article type
- Title
- Author names
- Author affiliations, and corresponding author’s full details
- Article summary
- Abstract
- Keywords
- Study approval
- Patient consent
- Funding statement
- Competing interests
- Contributor statement

For peer review only



**Comparative assessment of CDS, CLSI disc diffusion and Etest techniques for antimicrobial susceptibility testing of *Neisseria gonorrhoeae*: A six year study**

|                                 |                                                                                                                                                                                                                                                                                     |
|---------------------------------|-------------------------------------------------------------------------------------------------------------------------------------------------------------------------------------------------------------------------------------------------------------------------------------|
| Journal:                        | <i>BMJ Open</i>                                                                                                                                                                                                                                                                     |
| Manuscript ID:                  | bmjopen-2012-000969.R2                                                                                                                                                                                                                                                              |
| Article Type:                   | Research                                                                                                                                                                                                                                                                            |
| Date Submitted by the Author:   | 04-Jun-2012                                                                                                                                                                                                                                                                         |
| Complete List of Authors:       | Singh, Vikram; VMMC and Safdarjung Hospital, Apex Regional STD Centre Bala, Manju; VMMC and Safdarjung Hospital, Apex Regional STD Centre Kakran, Monika; VMMC and Safdarjung Hospital, Apex Regional STD Centre Ramesh, V.; VMMC and Safdarjung Hospital, Apex Regional STD Centre |
| <b>Primary Subject Heading</b>: | Sexual health                                                                                                                                                                                                                                                                       |
| Secondary Subject Heading:      | Diagnostics, Infectious diseases                                                                                                                                                                                                                                                    |
| Keywords:                       | Microbiology < BASIC SCIENCES, Diagnostic microbiology < INFECTIOUS DISEASES, PUBLIC HEALTH                                                                                                                                                                                         |
|                                 |                                                                                                                                                                                                                                                                                     |

SCHOLARONE™  
Manuscripts

1  
2  
3  
4 **Comparative assessment of CDS, CLSI disc diffusion and Etest techniques**  
5  
6  
7 **for antimicrobial susceptibility testing of *Neisseria gonorrhoeae*: A six year**  
8  
9 **study**  
10  
11  
12  
13  
14

15 **Vikram Singh, Manju Bala, Monika Kakran and V. Ramesh**  
16  
17  
18  
19

20 **Apex Regional STD Teaching, Training & Research Centre, Vardhman Mahavir**  
21  
22 **Medical College & Safdarjung Hospital, New Delhi, India.**  
23  
24  
25  
26

27 **Correspondence to:**  
28

29 Dr. Manju Bala, Consultant (Microbiology) and Associate Professor, Apex Regional STD  
30 Teaching, Training & Research Centre, 5<sup>th</sup> Floor, New OPD Building, Vardhman Mahavir  
31 Medical College & Safdarjung Hospital, New Delhi, India. Telephone number: 91-11-  
32 26196740, Fax number: 91-11-26163072, Email: [manjubala\\_2@hotmail.com](mailto:manjubala_2@hotmail.com)  
33  
34  
35  
36  
37  
38  
39  
40  
41

42 **Word count:** 2913 words  
43

44 **Keywords:** *Neisseria gonorrhoeae*, CDS disc diffusion, CLSI, Etest, Gonococcal  
45 Antimicrobial Surveillance Programme.  
46  
47

48 **Running title:** Comparison of CDS, CLSI, Etest for susceptibility testing of *N. gonorrhoeae*  
49  
50  
51  
52  
53  
54  
55  
56  
57  
58  
59  
60



## ARTICLE SUMMARY

### Article focus

- A variety of techniques are available for antimicrobial susceptibility testing (AST) of *Neisseria gonorrhoeae*.
- The aim of this study to find a cost-effective, reliable and easily applicable microbiological method to detect antimicrobial susceptibilities of *N. gonorrhoeae* in resource poor countries.

### Key messages

- This study highlighted that the CDS disc diffusion technique yielded excellent category agreement with their analogous Etest MICs in comparison to CLSI technique.
- CDS offers the advantage for those laboratories that process small numbers of specimens.
- CDS technique is cost-effective, reliable and easily applicable microbiological method to detect antimicrobial susceptibilities of *Neisseria gonorrhoeae* in resource poor countries.
- This technique will facilitate enhanced antimicrobial resistance surveillance and direct and meaningful comparison of resistance data generated within different national and international laboratories.

### Strengths and limitations of this study

- This is the first study to determine the comparability of CDS and CLSI disc diffusion method with Etest MICs and to accurately and reproducibly assess *N. gonorrhoeae* susceptibilities for penicillin, tetracycline, ceftriaxone, ciprofloxacin and spectinomycin, commonly used for susceptibility testing.
- Susceptibility testing for cefixime, cefpodoxime, gentamicin and azithromycin was performed only by one method because of non-availability of interpretation criteria for these antimicrobials or limitation of resources. Therefore, comparison of above three techniques could not be carried out for these antibiotics.

## ABSTRACT

**Background:** A variety of techniques are available for antimicrobial susceptibility testing (AST) of *Neisseria gonorrhoeae*.

**Objective:** The aim of this study was to find a cost-effective, reliable and easily applicable microbiological method to detect antimicrobial susceptibilities of *N. gonorrhoeae* in resource poor countries.

**Design:** Prospective study.

**Setting:** Male ~~STD clinic~~ and female STD clinic of Regional STD Teaching, Training and Research Centre, New Delhi, India.

**Participants:** *N. gonorrhoeae* isolates from all male and female patients presenting with acute gonococcal urethritis and cervical discharge.

**Material and Methods:** A total of ~~consecutive~~ 295 consecutive *N. gonorrhoeae* isolates during 2005 to 2010, ~~was~~ used to compare the CLSI and CDS disc diffusion technique with Etest by performing antimicrobial susceptibility testing in parallel for penicillin, tetracycline, ceftriaxone, ciprofloxacin and spectinomycin. WHO reference strains were used as controls.

**Results:** CDS disc diffusion zones of inhibition showed that complete percentage agreement for penicillin, ciprofloxacin and tetracycline was high with their analogous Etest MICs in comparison to CLSI disc diffusion technique i.e. 91.5%, 92.9%, 99.3% versus 87.5%, 88.5% and 74.9% respectively. CDS results had less number of major and minor category discrepancies in comparison to CLSI technique and CDS method showed excellent correlation coefficient ( $r = 1$ ) with Etest for all five antimicrobial agents tested in comparison

1  
2  
3 to CLSI ( $r = 0.92$ ). It was very poor ( $r = 0.61$ ) by CLSI method for tetracycline. The  
4  
5 correlation coefficients between the two methods and the Etest were identical if tetracycline  
6  
7 was removed from the CLSI analysis.  
8  
9

10 **Conclusions** The CDS technique is an attractive alternative for *N. gonorrhoeae* susceptibility  
11 testing and is recommended for monitoring the antimicrobial susceptibility in less developed  
12 and resource poor settings to facilitate enhanced antimicrobial resistance (AMR) surveillance  
13 when the WHO Gonococcal Antimicrobial Surveillance Programme is undergoing expansion  
14 to meet the ongoing challenges of surveillance and control of gonococcal AMR.  
15  
16  
17  
18  
19  
20  
21  
22  
23  
24  
25  
26  
27  
28  
29  
30  
31  
32  
33  
34  
35  
36  
37  
38  
39  
40  
41  
42  
43  
44  
45  
46  
47  
48  
49  
50  
51  
52  
53  
54  
55  
56  
57  
58  
59  
60

## INTRODUCTION

Gonorrhoea caused by *Neisseria gonorrhoeae* (*N. gonorrhoeae*) is one of the most common sexually transmitted infections and is a global health problem. Uncomplicated urogenital *N. gonorrhoeae* infections can lead to epididymitis in males and salpingitis in females, conditions that are associated with infertility. In some cases localized infections can lead to haematogenic dissemination causing severe complications like sepsis, meningitis and endocarditis. The worldwide distribution of *N. gonorrhoeae* and the emergence of resistance to various antimicrobials emphasize the importance of antimicrobial resistance (AMR) surveillance of clinical gonococcal isolates.

Antimicrobial susceptibility testing (AST) may be carried out by a variety of techniques. The most commonly used methods have been the high-content disc diffusion method first described by Bauer *et al*,[1] and later modified by the National Committee for Clinical Laboratory Standards (NCCLS),[2] the broth microdilution technique as described by the NCCLS,[3] the agar dilution method described by Ericsson and Sherris,[4] and adapted by the NCCLS,[3] more recently Etest (AB Biodisk, Solna, Sweden), a modification of the disc diffusion and the agar dilution methods mentioned previously. The Etest is an impervious carrier with a continuous gradient of antimicrobial agent applied to one side of the strip. The test is performed in the same manner as the disc diffusion test, but determines a minimal inhibitory concentration (MIC) of antimicrobial agent rather than a category result based on a zone size. The Calibrated Dichotomous Sensitivity (CDS) test is a method for determining

1  
2  
3 the antibiotic susceptibility of micro-organisms using agar disc diffusion and was developed  
4 in 1969 by Sydney M. Bell assisted by members of the Department of Microbiology, The  
5 Prince of Wales Hospital, Sydney, Australia. It was introduced into laboratory practice in  
6 Australia in an effort to correct the unsatisfactory results of antibiotic susceptibility testing in  
7 Australia that were obtained from surveys conducted by The Royal College of Pathologists  
8 of Australia in the late 60's and early 70's.[5]  
9

10  
11  
12  
13  
14  
15  
16  
17  
18 The recent emergence of *N. gonorrhoeae* isolates with decreased susceptibility and resistance  
19 to the currently recommended treatment guidelines of the Centers for Disease Control and  
20 Prevention, including extended-spectrum cephalosporins (ESC), has further established the  
21 necessity for a standardized, reliable, economical, less labor intensive and reproducible  
22 susceptibility testing method.[6-8] Previous studies with the Etest determined that results  
23 correlated well with the reference agar dilution method and that it is a useful guide for  
24 determining chemotherapy against many organisms,[9] including gonococci.[9-11] The CDS  
25 disc diffusion technique is recommended by WHO Collaborating Centre for STD, Sydney,  
26 Australia and was regarded as the only practical and affordable means of phenotypic  
27 susceptibility testing.[12] It was found to be cost-effective and more feasible during an  
28 external quality assurance scheme in routine diagnostic laboratories in developing countries  
29 like India.[12] Earlier this method was evaluated in comparison to Etest for only three  
30 antibiotics (ciprofloxacin, penicillin, and ceftriaxone) and that also on a limited number of  
31 isolates.[13] Moreover, tetracycline and spectinomycin (an alternative drug of choice for  
32 treatment of gonorrhea) were not tested in the earlier study of 2005. Recently, CDS technique  
33 has been recommended in less resourced settings for detection of decreased susceptibility to  
34  
35  
36  
37  
38  
39  
40  
41  
42  
43  
44  
45  
46  
47  
48  
49  
50  
51  
52  
53  
54  
55  
56 oral ESCs using cefpodoxime disc;[14] and interpretation criteria for azithromycin by CDS  
57  
58  
59  
60

1  
2  
3  
4  
5  
6  
7  
8  
9  
10  
11  
12  
13  
14  
15  
16  
17  
18  
19  
20  
21  
22  
23  
24  
25  
26  
27  
28  
29  
30  
31  
32  
33  
34  
35  
36  
37  
38  
39  
40  
41  
42  
43  
44  
45  
46  
47  
48  
49  
50  
51  
52  
53  
54  
55  
56  
57  
58  
59  
60

have been established in September 2011. The purpose of this study was to determine the comparability of the Etest, CDS and Clinical and Laboratory Standards Institute (CLSI) disc diffusion technique, formerly NCCLS, to accurately and reproducibly assess *N. gonorrhoeae* susceptibilities for five antibiotics commonly used for susceptibility testing, which included penicillin, tetracycline, ceftriaxone, spectinomycin and ciprofloxacin. The aim was also to assess the feasibility of recommending CDS technique for its use in developing and resource poor countries. To our knowledge, this is the first study to compare the two disc diffusion methods with Etest MIC testing for above five antibiotics.

## MATERIALS AND METHODS

### *N. gonorrhoeae* isolates

A total of 295 *N. gonorrhoeae* isolates from all male and female patients presenting with acute gonococcal urethritis and cervical discharge respectively to the Regional STD Teaching, Training and Research Centre, Safdarjung Hospital, New Delhi, India from January 2005 to December 2010 were included in the study. The strains were consecutive and nonrepetitive. Methods used for isolation and identification of *N. gonorrhoeae* have been described previously.[15]

### $\beta$ -lactamase testing

*N. gonorrhoeae* isolates were tested for  $\beta$ -lactamase production by the chromogenic cephalosporin method using nitrocefin freeze dried powder (Oxoid) or nitrocefin slide (Becton, Dickinson and Company, Maryland).[15]

### Antimicrobial susceptibility testing

#### *Inoculum Preparation*

1  
2  
3 The inoculum was prepared from 18 to 24 hour pure culture on chocolate agar medium and a  
4  
5 homogenized suspension was prepared in 5 ml of sterile saline solution and turbidity was  
6  
7 adjusted to an equivalent of 0.5 McFarland standard. Same suspension was used for the  
8  
9 following three methods of antimicrobial susceptibility testing within 15 minutes. All the  
10  
11 following three susceptibility tests were run simultaneously on same day.  
12  
13

#### 14 15 *CDS disc diffusion technique*

16  
17 Antibiotic susceptibility testing of all the 295 *N. gonorrhoeae* isolates was performed by the  
18  
19 CDS technique on chocolate agar plates (Columbia agar base, HiMedia Laboratories Pvt.  
20  
21 Ltd., Mumbai, India) with low concentration antibiotic discs (Oxoid Basingstoke, UK). Six  
22  
23 antibiotics with concentrations recommended i.e. penicillin (0.5 IU), tetracycline (10µg),  
24  
25 ceftriaxone (0.5µg), ciprofloxacin (1µg), spectinomycin (100µg) and nalidixic acid (30µg)  
26  
27 were used as per standard methodology.[16] The strains were interpreted as susceptible, less  
28  
29 susceptible and resistant.[16] Nalidixic acid was used only to identify isolates less  
30  
31 susceptible to ciprofloxacin and results of susceptibility to this antibiotic are not included.  
32  
33  
34  
35  
36

#### 37 38 *CLSI disc diffusion method*

39  
40 Same inoculum was used for this method, which was performed using GC agar base (Oxoid  
41  
42 Ltd., Basingstoke, Hampshire, England) with 1% isovitalax or vitamino growth supplement  
43  
44 (Hi Media Laboratories Pvt. Ltd, Mumbai, India) with higher disc concentration (HiMedia  
45  
46 Laboratories Pvt. Ltd., Mumbai, India) recommended by CLSI i.e. penicillin (10 IU),  
47  
48 tetracycline (30µg), ceftriaxone (30µg), ciprofloxacin (5µg), spectinomycin (100µg) and  
49  
50 nalidixic acid (30µg) were used.[17] The strains were defined as susceptible, less susceptible  
51  
52 and resistant. [17]  
53  
54  
55  
56

#### 57 58 *Etest Minimum Inhibitory Concentration (MIC) determination*



1  
2  
3 The MICs of all the isolates for penicillin, tetracycline, ciprofloxacin, spectinomycin, and  
4  
5 ceftriaxone were determined by the Etest method (AB Biodisk, Solna, Sweden) on GC agar  
6  
7  
8 base with 1% isovitalex or vitamino growth supplement. The Etest was performed as  
9  
10 specified in the manufacturer's product package insert. The strains were defined as  
11  
12 susceptible, less susceptible and resistant. [17] The Etest method was selected as the  
13  
14  
15 reference method for comparison of results of CDS and CLSI [disc diffusion](#) techniques.  
16  
17

### 18 **Control strains**

19  
20 *N. gonorrhoeae* WHO reference strains C, G, K, L, O and Q were used as controls for disc  
21  
22 diffusion and Etest MIC testing. The WHO control strains K and L with decreased  
23  
24 susceptibility to extended-spectrum cephalosporins were included in 2010 as these became  
25  
26 available to this centre only by the end of 2009.[18] [The reproducibility of control strains  
27  
28 tested for Etest, CDS and CLSI disc diffusion method was >95%](#). This centre participated in  
29  
30 External Quality assurance Scheme (EQAS) of gonococcal AST from 2001 to 2010 conducted  
31  
32 by the Neisseria Reference Laboratory, WHO Collaborating Centre for STD, Sydney,  
33  
34 Australia. EQAS results every year showed almost 100% agreement with the reference  
35  
36 laboratory expected results, except some disagreement of results was observed for one strain  
37  
38 for ceftriaxone in 2002, 2007, 2008, 2010 and for one strain for penicillin in 2004 and 2010.  
39  
40 On repeat testing, 100% agreement was observed.  
41  
42  
43  
44  
45  
46

### 47 **Statistical analysis**

48  
49 Discrepancies were differentiated into three categories, minor ([susceptible 'S' interpreted as  
50  
51 less sensitive 'LS', 'LS' as 'S' or resistant 'R' and 'R' as 'LS' involving the less susceptible  
52  
53 category](#)), major (['S' interpreted as 'R' false susceptibility](#)) and very major (['R' interpreted as  
54  
55 'S' false resistant](#)) which are defined by U.S. Department of Health and Human Services  
56  
57  
58  
59  
60

1  
2  
3 Food and Drug Administration.[19] Complete and essential percent agreement between the  
4 reference and test method was evaluated. The complete percent agreement is the percentage  
5 of isolates tested by the test method which gave the same category as those tested by the  
6 reference method. The essential percent agreement value is the percentage of agreement  
7 obtained between the reference and test method when minor discrepancies are ignored.[19]

8  
9  
10  
11  
12  
13  
14  
15 Pearson's correlation coefficient ( $r$  values) was generated for each antimicrobial agent  
16 indexed by susceptibility test method. Statistical correlation result was considered perfect for  
17 the correlation coefficient ( $r$  value) of 1.00, desirable for  $\geq 0.90$  and acceptable for  $\geq 0.80$ .  
18  
19  
20  
21  
22  
23  
24

## 25 RESULTS

26  
27  
28 The incidence of susceptible, less susceptible and resistant isolates differed following the  
29 performance of both the disc diffusion assays and Etest (Table 1). Table 2 and 3 show the  
30 comparison of discrepancies and agreement of CDS and CLSI disc diffusion method with  
31 Etest for five different antibiotics. In overall, the rates of discrepancies for different  
32 antibiotics differed in both the CDS and CLSI technique on comparison to Etest method. On  
33 comparison of CDS method with Etest the highest discrepancy rate was observed for  
34 penicillin (8.5%) and lowest for spectinomycin (0) and overall complete agreement was  
35 82.0%.  
36  
37  
38  
39  
40  
41  
42  
43  
44

45  
46  
47 ~~Highest discrepancy rate~~ While, ~~for with the~~ CLSI disc diffusion method ~~highest discrepancey~~  
48 ~~rate~~ was detected for tetracycline (25.1%), ~~and It was~~ lowest for spectinomycin (0) and  
49 overall complete agreement was 49.5%. A total no. of minor and major error was 133 and 16  
50 respectively for CLSI disc diffusion metod while for CDS they were only 51 and 2  
51  
52  
53  
54  
55  
56  
57  
58  
59  
60

1  
2  
3  
4  
5  
6  
7  
8  
9  
10  
11  
12  
13  
14  
15  
16  
17  
18  
19  
20  
21  
22  
23  
24  
25  
26  
27  
28  
29  
30  
31  
32  
33  
34  
35  
36  
37  
38  
39  
40  
41  
42  
43  
44  
45  
46  
47  
48  
49  
50  
51  
52  
53  
54  
55  
56  
57  
58  
59  
60

by CDS test was high in comparison to CLSI [disc diffusion](#) technique. It was found to be same for spectinomycin and ceftriaxone. Pearson's correlation coefficient was perfect for all the antibiotics by the CDS method in comparison to CLSI technique i.e. *r* value 1.00 versus 0.92. Moreover, it was very poor (0.61) by CLSI [disc diffusion](#) method for tetracycline.

Results with individual antibiotics by the three techniques were as follows:

### Penicillin

Out of 295 isolates, 34 (11.5%), 156 (52.9%), and 105 (35.6%) isolates were interpreted as susceptible, less susceptible and resistant respectively by the Etest method (Table 1). On comparison of CDS and CLSI [disc diffusion technique](#) with Etest method, minor discrepancies were observed to be 8.5% and 12.5% respectively while no major or very major discrepancies were found ([Table 2 and 3](#)). The complete percent agreement of penicillin for the CDS and CLSI method with Etest was 91.5% & 87.5% respectively and the essential agreement for both was found as 100% (Table 2 and 3). Penicillin demonstrated high level of correlation coefficient (0.99) on comparison of both the methods. Antibiotic susceptibility by the Etest method revealed that 105 (35.6%) isolates were resistant to penicillin, out of which 95 (32.2%) were  $\beta$ -lactamase positive and 10 (3.4%) were having chromosomally mediated resistance. Out of remaining 190 (64.4%) isolates, 156 (52.9%) had reduced susceptibility to penicillin and 34 (11.5%) were susceptible to penicillin.

### Ciprofloxacin

Only 1 (0.3%) isolate was found susceptible for ciprofloxacin with the Etest method. The no. of less susceptible and resistant isolates were 48 (16.3%) and 246 (83.4%) respectively (Table 1). Out of 246 resistant isolates, 102 (34.6%) were observed to have high level resistance ( $MIC \geq 4$ ). On comparison of Etest method with CDS and CLSI [disc diffusion](#)

1  
2  
3 methods, minor discrepancies were observed as 7.1% and 11.5% respectively ([Table 2 and](#)  
4  
5  
6 [3](#)). The complete agreement for both the CDS and CLSI was 92.9% and 88.5% respectively.

7  
8 No major and very major discrepancies occurred. Person's correlation coefficient was  
9  
10 excellent ( $r = 0.99$ ) for both the methods (Table 2 and 3).

### 11 12 **Ceftriaxone**

13  
14 Out of 295 isolates, 283 (95.9%) were susceptible and remaining 12 (4.1%) were observed to  
15  
16 have decreased susceptibility for ceftriaxone by the Etest method (Table 1). On comparison  
17  
18 of CDS and CLSI [disc diffusion](#) methods with the Etest method, 1.7% and 1.4% minor  
19  
20 discrepancy were observed respectively ([Table 2 and 3](#)). The complete percent agreement for  
21  
22 ceftriaxone was 98.3% and 98.6% for both the methods. Essential agreement for both the  
23  
24 methods was 100% with the Etest method (Table 2 and 3). Pearson's correlation coefficient  
25  
26 was perfect ( $r = 1$ ) for both the methods.  
27  
28  
29  
30

### 31 32 **Spectinomycin**

33  
34 All the isolates were susceptible to spectinomycin, by all the three methods (Table 1). This  
35  
36 resulted in 100% of essential and complete agreement on comparison of the CDS and CLSI  
37  
38 method with the Etest method (Table 2 [and 3](#)).  
39  
40

### 41 42 **Tetracycline**

43  
44 Out of 295 isolates, 58 (19.7%) were Tetracycline-resistant *N. gonorrhoeae* (TRNG) while  
45  
46 237 (80.3%) were Not-Tetracycline-resistant *N. gonorrhoeae* (N-TRNG) by the Etest method  
47  
48 (Table 1). Out of 237 N-TRNG isolates, 116 (39.3%), 91 (30.8%) and 30 (10.2 %) were  
49  
50 observed as susceptible, less susceptible and resistant respectively. On comparison of N-  
51  
52 TRNG isolates by the CLSI [disc diffusion](#) technique with the Etest method, 5.4% and 19.7%  
53  
54 major and minor discrepancies were found respectively ([Table 3](#)). The complete and essential  
55  
56  
57  
58  
59  
60

1  
2  
3 percentage agreement for the CLSI technique was 74.9% and 94.6% respectively. By the  
4  
5 CDS method 60 (20.3%) isolates were observed to be TRNG and 235 (79.7%) N-TRNG  
6  
7 [\(Table 1\)](#). Only 2 (0.7%) isolates were found under major discrepancy on comparison of the  
8  
9 CDS method with Etest method. Both complete and essential percent agreement between  
10  
11 CDS and Etest method was 99.3% [\(Table 2\)](#). Tetracycline demonstrated perfect correlation  
12  
13 coefficient ( $r = 1$ ) for CDS and Etest method on the basis of TRNG and N-TRNG category  
14  
15 comparison [\(Table 2\)](#). However, for comparison of 80.3% N-TRNG isolates with Etest  
16  
17 method, it was observed to be very poor ( $r = 0.61$ ) by the CLSI [disc diffusion](#) technique  
18  
19 [\(Table 2 and 3\)](#).  
20  
21  
22  
23  
24  
25  
26  
27  
28  
29  
30  
31  
32  
33  
34  
35  
36  
37  
38  
39  
40  
41  
42  
43  
44  
45  
46  
47  
48  
49  
50  
51  
52  
53  
54  
55  
56  
57  
58  
59  
60

Table 1. Results of susceptibility testing of 295 *N. gonorrhoeae* isolates for five antibiotics by three techniques from 2005-2010.

| Method | Penicillin |        |        | Ciprofloxacin |        |        | Spectinomycin |    |   | Ceftriaxone |       |   | Tetracycline |        |        | Tetracycline |        |
|--------|------------|--------|--------|---------------|--------|--------|---------------|----|---|-------------|-------|---|--------------|--------|--------|--------------|--------|
|        | S          | LS     | R      | S             | LS     | R      | S             | LS | R | S           | LS    | R | S            | LS     | R      | TRNG         | N-TRNG |
| Etest  | 34         | 156    | 105    | 1             | 48     | 246    | 295           | -  | 0 | 283         | 12    | 0 | 116          | 91     | 30     | 58           | 237    |
|        | (11.5)     | (52.9) | (35.6) | (0.3)         | (16.3) | (83.4) | (100)         |    |   | (95.9)      | (4.1) |   | (39.3)       | (30.8) | (10.2) | (19.7)       | (80.3) |
| CDS    | 30         | 151    | 114    | 1             | 27     | 267    | 295           | -  | 0 | 282         | 13    | 0 | -            | -      | -      | 60           | 235    |
|        | (10.2)     | (51.2) | (38.6) | (0.3)         | (9.2)  | (90.5) | (100)         |    |   | (95.6)      | (4.4) |   |              |        |        | (20.3)       | (79.7) |
| CLSI   | 21         | 157    | 117    | 1             | 64     | 230    | 295           | 0  | 0 | 283         | 12    | 0 | 80           | 103    | 64     | 48           | 247    |
|        | (7.1)      | (53.2) | (39.7) | (0.3)         | (21.7) | (78.0) | (100)         |    |   | (95.9)      | (4.1) |   | (27.1)       | (35.9) | (21.7) | (16.3)       | (83.7) |

S, Susceptible; LS, Less susceptible; R, Resistant; TRNG, Tetracycline Resistant *N. gonorrhoeae*; N-TRNG, Not-TRNG.

Table 2. Comparison of discrepancies and agreement between the CDS and Etest method for 295 *N. gonorrhoeae* isolates.

| Antimicrobial Agent | No. of discrepancies |       |            | % agreement |           | Correlation coefficient (r) |
|---------------------|----------------------|-------|------------|-------------|-----------|-----------------------------|
|                     | Minor                | Major | Very major | Complete    | Essential |                             |
| Penicillin          | 25                   | 0     | 0          | 91.5        | 100       | 0.99                        |
| Ciprofloxacin       | 21                   | 0     | 0          | 92.9        | 100       | 0.99                        |
| Spectinomycin       | 0                    | 0     | 0          | 100         | 100       | 1.0                         |
| Ceftriaxone         | 5                    | 0     | 0          | 98.3        | 100       | 1.0                         |
| Tetracycline        | 0                    | 2     | 0          | 99.3        | 99.3      | 1.0                         |
| All                 | 51                   | 2     | 0          | 82.0        | 99.3      | 1.0                         |

Minor, 'S' and 'R' as 'LS' or 'LS' as 'S' or 'R'; Major, 'S' as 'R'; Very major, 'R' as 'S'.

1  
2  
3  
4  
5  
6  
7  
8  
9  
10  
11  
12  
13  
14  
15  
16  
17  
18  
19  
20  
21  
22  
23  
24  
25  
26  
27  
28  
29  
30  
31  
32  
33  
34  
35  
36  
37  
38  
39  
40  
41  
42  
43  
44  
45  
46  
47  
48  
49

Table 3. Comparison of discrepancies and agreement between the CLSI and Etest method for 295 *N. gonorrhoeae* isolates.

| Antimicrobial Agent | No. of discrepancies |       |            | % agreement |           | Correlation coefficient (r) |
|---------------------|----------------------|-------|------------|-------------|-----------|-----------------------------|
|                     | Minor                | Major | Very major | Complete    | Essential |                             |
|                     | Penicillin           | 37    | 0          | 0           | 87.5      |                             |
| Ciprofloxacin       | 34                   | 0     | 0          | 88.5        | 100       | 0.99                        |
| Spectinomycin       | 0                    | 0     | 0          | 100         | 100       | 1.0                         |
| Ceftriaxone         | 4                    | 0     | 0          | 98.6        | 100       | 1.0                         |
| Tetracycline        | 58                   | 16    | 0          | 74.9        | 94.6      | 0.61                        |
| All                 | 133                  | 16    | 0          | 49.5        | 94.6      | 0.92                        |



## DISCUSSION

An important and essential measure for monitoring the effectiveness of recommended drugs for the treatment of gonorrhoea is surveillance of the in vitro antimicrobial susceptibilities of clinical isolates of *N. gonorrhoeae*. The recommend procedure for antimicrobial susceptibility testing of gonococci is determination of the MICs by an agar dilution technique.[17] However, this method is performed only in research laboratories, mainly in industrialized countries. Moreover, agar dilution technique requiring a number of isolates at one time is not a feasible technique for determining MIC for this organism because the numbers of isolates even in a central level laboratory are very few and *N. gonorrhoeae* being a fastidious organism is difficult to store for long periods. Etest in a number of studies has already been shown to be an effective alternative and a more appropriate method than the agar dilution technique for MIC determination for *N. gonorrhoeae* by laboratories in developing countries, where resistance of gonococci to antimicrobial agents is a major public health problem.[9-11, 20] Therefore, the Etest method was considered as the reference method in this study for comparison of MIC results with CDS and CLSI disc diffusion techniques. An excellent essential agreement (92-99%) was demonstrated between Etest and standard agar dilution technique for the antibiotics commonly used for susceptibility testing of *N. gonorrhoeae*, [20] and these percentages were above the recommended limitations ( $\geq 90\%$ ) set by the Food and Drug Administration's *Review Criteria for Assessment of Antimicrobial Susceptibility Devices*, confirming that the Etest satisfactorily approximates the agar reference method.[20] Yeung KH *et al*, [11] also reported 98% overall agreement between Etest and the agar dilution method.

The original purpose of this study was to assess reliability and comparability of the CDS and CLSI [disc diffusion](#) method to predict the interpretative categories of susceptibility as

1  
2  
3 compared with standard Etest method. However, because all test procedures were done from  
4 the same inoculum and were carefully controlled, we had a unique opportunity to compare  
5 the two methods with Etest method which was used as reference standard and the Etest MIC  
6 values were supported by satisfactory Quality Control (QC) measures. Protocols in both the  
7 disc diffusion techniques differ in their choices of test medium, antibiotic disc content, and  
8 interpretative breakpoint criteria. Zones of inhibition delineating susceptible, less susceptible  
9 and resistant isolates from disc diffusion procedures must correlate with corresponding  
10 MICs. In the present study, CDS results correlation was excellent with Etest MICs which had  
11 less number of major and minor category discrepancies in comparison to CLSI disc diffusion  
12 technique i.e. 2 and 52 versus 16 and 133. Complete percent agreement of CDS with Etest  
13 was 82.0% while for CLSI disc diffusion method it was 49.5% which was very poor  
14 agreement. CDS method showed excellent correlation coefficient ( $r = 1$ ) with Etest for all  
15 five antimicrobial agents tested in comparison to CLSI ( $r = 0.92$ ). Previously study of our  
16 centre had shown 96.9 percent agreement for ceftriaxone for comparison of CDS with Etest  
17 technique.[13] Interpretation of disc inhibition zones in CDS method was easier than in the  
18 CLSI technique especially when the zone size was near the breakpoint. Double zone of  
19 inhibition was observed many times in CLSI technique leading to difficulty in interpretation.  
20 In an another study from WHO Collaborating Centre for STD in Australia and Sweden, the  
21 correlation between results of CDS disc diffusion testing (cefpodoxime), and MIC  
22 determinations with agar dilution and Etest using cefpodoxime, cefixime and ceftriaxone for  
23 the detection of decreased ESC susceptibility in *N. gonorrhoeae* was investigated.[14] CDS  
24 technique using cefpodoxime 10  $\mu$ g disc was shown to provide high sensitivity for detection  
25 of gonococcal isolates with decreased ESC susceptibility and it was suggested that this disc  
26  
27  
28  
29  
30  
31  
32  
33  
34  
35  
36  
37  
38  
39  
40  
41  
42  
43  
44  
45  
46  
47  
48  
49  
50  
51  
52  
53  
54  
55  
56  
57  
58  
59  
60

1  
2  
3 test will make it possible to provide AMR surveillance data also from less-developed and/or  
4 less-resourced settings, where disc testing is the only practical and affordable means of AMR  
5 testing.[14]  
6  
7  
8  
9

10 Our findings reveal poor correlation between CLSI disc diffusion results and Etest MICs,  
11 most notably for tetracycline, penicillin and ciprofloxacin. Further, if tetracycline were  
12 removed from the CLSI analysis, then the correlation coefficients between the two methods  
13 and the Etest were identical. It is reported in the literature that there are problems on the  
14 reproducibility of results with tetracycline, especially when different media are used.  
15  
16  
17  
18  
19

20 Excellent correlation was observed for ceftriaxone and spectinomycin, reason being that  
21 resistance was not reported for these antimicrobial agents in the present study. ~~Emergence of  
22 resistance to both these antibiotics may lead to poor agreement between CLSI and Etest.~~ Our  
23 results compared well with that from China,[21] where poor per cent agreement was reported  
24 between the CLSI and agar dilution technique for MIC testing. It was 73.6%, 72.3% and  
25 71.4% for ciprofloxacin, penicillin and ceftriaxone respectively. Given the disparity among  
26 susceptibility test results presented here, errors associated with susceptibility testing may  
27 result in the unwarranted utilization or elimination of these antibiotics as part of possible  
28 treatment regimens.  
29  
30  
31  
32  
33  
34  
35  
36  
37  
38  
39  
40  
41  
42

43 The results of our study suggest that CDS disc diffusion technique could be reliably used in  
44 resistance surveillance programmes for public health purposes and it can be recommended  
45 for use by all the focal point laboratories in WHO GASP network in SEAR because of its  
46 excellent agreement with Etest results and also it was simple, cost-effective and results are  
47 easier to interpret. In many developing countries in SEAR and other regions, most afflicted  
48 by gonorrhoea and AMR, MIC determination using agar dilution method or Etest is not  
49  
50  
51  
52  
53  
54  
55  
56  
57  
58  
59  
60

1  
2  
3 readily accessible or affordable. Especially in those countries, the availability of a sensitive,  
4  
5 rapid, inexpensive, easily performed and effective disc test can be highly valuable. Use of a  
6  
7 standardized agar diffusion method is practical in these situations and allows fast and  
8  
9 reproducible results for clinical microbiology laboratories if standards are observed.[22]

10  
11 To conclude, this is the first study to compare CDS and CLSI disk diffusion method with  
12  
13 Etest and the CDS technique yielded excellent category agreement results when compared  
14  
15 with the Etest. The data obtained in the present study suggest that the CDS technique is an  
16  
17 accurate alternative method for susceptibility testing of *N. gonorrhoeae* for various  
18  
19 antimicrobial agents. It is much less cumbersome than the current reference method because  
20  
21 of its simplicity, less consumption of media and glassware and is a more appropriate  
22  
23 technique in settings with minimal microbiological resources. CDS offers the advantage for  
24  
25 those laboratories that process small numbers of specimens and these laboratories could  
26  
27 determine the susceptibilities of gonococcal isolates reasonably accurately. This could  
28  
29 facilitate direct and meaningful comparison of resistance data generated within different  
30  
31 national and international laboratories.  
32  
33  
34  
35  
36  
37  
38  
39  
40  
41

42 **Acknowledgements:** The authors are indebted to A/Professor John W. Tapsall AM, Ms.  
43  
44 Athena E. Limnios and A/Professor Monica M. Lahra, WHO collaborating centre for STD,  
45  
46 Department of Microbiology, The Prince of Wales Hospital, Sydney, Australia for supplying  
47  
48 WHO Reference strains and low concentration antibiotic discs. The support of WHO and  
49  
50 NACO is gratefully acknowledged. We are grateful to Mrs. Leelamma Peter and Mr. Naveen  
51  
52 Chandra Joshi for their excellent technical assistance.  
53  
54

55  
56 **Funding:** Nil.  
57  
58  
59  
60

1  
2  
3 **Competing interests:** None declared.  
4

5 **Ethical approval:** Not required.  
6  
7

8 **Contributors:** MB designed the study and coordinated the work. VS and MB carried out  
9 analysis of data and preparation of manuscript. MK participated in data analysis and VR  
10 collaborated in the writing of the manuscript.  
11  
12  
13

14  
15  
16  
17  
18 There is no additional data available.  
19  
20

## 21 22 23 **Copyright**

24  
25 The Corresponding Author has the right to grant on behalf of all authors and  
26 does grant on behalf of all authors, an exclusive licence (or non exclusive for  
27 government employees) on a worldwide basis to the BMJ Publishing Group Ltd to  
28 permit this article (if accepted) to be published in STI and any other BMJPG  
29 products and sub-licences such use and exploit all subsidiary rights, as set out  
30 in our licence (<http://sti.bmjournals.com/ifora/licence.pdf>).  
31  
32  
33  
34  
35  
36  
37  
38  
39

## 40 **REFERENCES**

- 41  
42  
43 1 Bauer AW, Kirby WM, Sherris JC, *et al.* Antibiotic susceptibility testing by a  
44 standardized single disk method. *Am J Clin Pathol* 1966;**45**:493-6.  
45  
46  
47  
48 2 National Committee for Clinical Laboratory Standards. Performance standards for  
49 antimicrobial disk susceptibility test. *Tentative standard, M2-T4*, 1988;vol 8. National  
50 Committee for Clinical Laboratory Standards, Villanova, Pa.  
51  
52  
53  
54  
55  
56  
57  
58  
59  
60

- 1  
2  
3  
4  
5  
6  
7  
8  
9  
10  
11  
12  
13  
14  
15  
16  
17  
18  
19  
20  
21  
22  
23  
24  
25  
26  
27  
28  
29  
30  
31  
32  
33  
34  
35  
36  
37  
38  
39  
40  
41  
42  
43  
44  
45  
46  
47  
48  
49  
50  
51  
52  
53  
54  
55  
56  
57  
58  
59  
60
- 3 National Committee for Clinical Laboratory Standards. Methods for dilution antimicrobial susceptibility test for bacteria that grow aerobically. *Tentative standard, M7-T2*, 1988; vol. 8. National Committee for Clinical Laboratory Standards, Villanova, Pa.
- 4 Ericsson HM, Sherris JC. Antibiotic sensitivity testing. Report of an international collaborative study. *Acta Pathol Microbiol Scand* 1971;**217** Sect. B Suppl:1-90.
- 5 Bell SM. The Calibrated Dichotomous Sensitivity (CDS) disc method of antibiotic sensitivity testing. *Pathology* 1975;**7** Suppl:1-48.
- 6 Bala M, Ray K, Gupta SM, *et al.* Changing trends of antimicrobial susceptibility pattern of *Neisseria gonorrhoeae* in India and the emergence of ceftriaxone less susceptible *N. gonorrhoeae* strains. *J Antimicrob Chemother* 2007;**60**:582-6.
- 7 Unemo M, Golparian D, Syversen G, *et al.* Two cases of verified clinical failures using internationally recommended first-line cefixime for gonorrhoea treatment, Norway, 2010. *Euro Surveill* 2010;**15**(47):pii=19721.
- 8 Ohnishi M, Golparian D, Shimuta K, *et al.* Is *Neisseria gonorrhoeae* initiating a future era of untreatable gonorrhea? Detailed characterization of the first strain with high-level resistance to ceftriaxone. *Antimicrob Agents Chemother* 2011;**55**:3538-45.
- 9 Sanchez ML, Barrett MS, Jones RN. The Etest applied to susceptibility test of gonococci, multiple-resistant enterococci and Entobacteriaceae producing potent beta-lactamases. *Diagn Microbiol Infect Dis* 1992;**15**:459-63.
- 10 Dyck EV, Smet H, Piot P. Comparison of E test with agar dilution for antimicrobial susceptibility testing of *Neisseria gonorrhoeae*. *J Clin Microbiol* 1994;**32**:1586-8.

- 1  
2  
3  
4  
5  
6  
7  
8  
9  
10  
11  
12  
13  
14  
15  
16  
17  
18  
19  
20  
21  
22  
23  
24  
25  
26  
27  
28  
29  
30  
31  
32  
33  
34  
35  
36  
37  
38  
39  
40  
41  
42  
43  
44  
45  
46  
47  
48  
49  
50  
51  
52  
53  
54  
55  
56  
57  
58  
59  
60
- 11 Yeung KH, Ng LK, Dillon JA. Evaluation of Etest for testing antimicrobial susceptibilities of *Neisseria gonorrhoeae* isolates with different growth media. *J Clin Microbiol* 1993;**31**:3053–5.
- 12 Bala M, Tapsall JW, Limnios A, *et al.* Experience with an external quality assurance scheme for antimicrobial susceptibility testing of *Neisseria gonorrhoeae* in India, 2001–2007. *Epidemiol Infect* 2010;**138**:69–75.
- 13 Bala M, Ray K, Gupta S. Comparison of disc diffusion results with minimum inhibitory concentration (MIC) values for antimicrobial susceptibility testing of *Neisseria gonorrhoeae*. *Indian J Med Res* 2005;**122**:48-51.
- 14 Limnios A, Tapsall J, Kahlmeter J, *et al.* Cefpodoxime 10 µg disc screening test for detection of *Neisseria gonorrhoeae* with mosaic PBP2 and decreased susceptibility to extended-spectrum cephalosporins for public health purposes. *APMIS* 2011;**119**:356-63.
- 15 Laboratory diagnosis of gonorrhoea. *WHO Regional Publication, South East Asia series no 33*: World Health Organisation, Geneva, 1999.  
<http://w3.whosea.org/book33/> [accessed 22 December, 2011]
- 16 Bell SM, Pham JN, Fisher GT. Antibiotic susceptibility testing by the CDS method. *A manual for medical and veterinary laboratories*. Fifth edition. 2009; P42-58.  
<http://web.med.unsw.edu.au/cdstest> [accessed 22 December, 2011]
- 17 Clinical and Laboratory Standards Institute (CLSI). Performance standards for antimicrobial susceptibility testing. Seventeenth Informational Supplement. *CLSI document M100-S17*. Wayne, USA: Clinical and Laboratory Standards Institute 2007.

- 1  
2  
3  
4 18 Unemo M, Fasth O, Fredlund H, *et al*. Phenotypic and genetic characterization of the  
5  
6 2008 WHO *Neisseria gonorrhoeae* reference strain panel intended for global quality  
7  
8 assurance and quality control of gonococcal antimicrobial resistance surveillance for  
9  
10 public health purposes. *J Antimicrob Chemother* 2009;**63**:1142–51.  
11  
12  
13 19. U.S. Food and Drug Administration. Class II Special Controls Guidance Document:  
14  
15 Antimicrobial Susceptibility Test (AST) Systems. U.S. Department of Health and  
16  
17 Human Services Food and Drug Administration, Center for Devices and Radiological  
18  
19 Health. Issued March 5, 2007.  
20  
21  
22 [http://www.fda.gov/MedicalDevices/DeviceRegulationandGuidance/GuidanceDocum](http://www.fda.gov/MedicalDevices/DeviceRegulationandGuidance/GuidanceDocuments/ucm080187.htm)  
23  
24 [ents/ucm080187.htm](http://www.fda.gov/MedicalDevices/DeviceRegulationandGuidance/GuidanceDocuments/ucm080187.htm) [accessed 28 December, 2011]  
25  
26  
27  
28 20 Biedenbach DJ, Jones RN. Comparative Assessment of Etest for Testing  
29  
30 Susceptibilities of *Neisseria gonorrhoeae* to Penicillin, Tetracycline, Ceftriaxone,  
31  
32 Cefotaxime, and Ciprofloxacin: Investigation Using 510(k) Review Criteria,  
33  
34 recommended by the Food and Drug Administration. *J Clin Microbiol* 1996;**32**:14-7.  
35  
36  
37  
38 21 Guoming L, Qun C, Shengchun W. Resistance of *Neisseria gonorrhoeae* epidemic  
39  
40 strains to antibiotics: report of resistant isolates and surveillance in Zhanjiang, China:  
41  
42 1998 to1999. *Sex Transm Dis* 2000;**27**:115-8.  
43  
44  
45 22 Jones RN, Gerlach EH, Koontz FP, *et al*. Development of *Neisseria gonorrhoeae* in  
46  
47 vitro susceptibility test methods for cefixime including quality control guidelines.  
48  
49 *Diagn Microbiol Infect Dis* 1990;**14**:383-8.  
50  
51  
52  
53  
54  
55  
56  
57  
58  
59  
60



**Research Check List**

- Article type
- Title
- Author names
- Author affiliations, and corresponding author's full details
- Article summary
- Abstract
- Keywords
- Study approval
- Patient consent
- Funding statement
- Competing interests
- Contributor statement
